# Supplementary material for: Investigation and research on elderly people’s willingness to combine medical and health care and related factors in coastal cities in eastern China
Source: PeerJ. 2022 Sep 7;10:e14004. doi: 10.7717/peerj.14004 (PMC9463997; doi:10.7717/peerj.14004)
Supplement: Supplemental Information 4 [file peerj-10-14004-s004.xlsx]

## Sheet: Worksheet
1.gender	2.age	3.Level of education	4.Household type	5.Marital status	childless.Children	7.Occupation before retirement	8.Medical treatment insurance	9.endowment Insurance	10.Family monthly income	11 .Your physical health	12.Your living conditions	13.Have you experienced any pain in any part of your body in the last two weeks?	14 .Have you had enough energy to take care of your daily routine in the last two weeks?	15. Lack of security	16.Self sealing	17.Lack of living power	18.Difficult to cope with life changes	19.Big mood swings	20.Have you ever known the integration of medical treatment, pension, nursing and rehabilitation?	21.Your current mode of care	22. The place I live in now is very neat and clean	23.It's like home where I live now	24.I feel my family's care for me is warm, do not feel dislike	25.I'm attached to my family's care services	26.Requires home care9.Expected Care Model (Home Care)	26.(Community Care)	26.(Institutional Care)	26.(Mutual pension)	26.(other)	27.You do not support the combination of medical treatment, pension, nursing and rehabilitation)?	27 .How much money are you willing to spend every month on medical treatment, pension, rehabilitation and nursing(YUAN/month)	28 .Your child does not support the combination of medical treatment, pension, nursing and rehabilitation	29 .What do you think has the greatest impact on your entering a nursing home	30.Which facilities do you care about (e.g. WiFi, positioning system for the elderly, etc.)	30.Which facilities do you care about :Safety equipment (emergency calling system, wall handrails)	30.Which facilities do you care about： rehabilitation equipment (Training ladder)	30.Which facilities do you care about：medical equipment (portable oxygen tanks, first aid kit)	30.Which facilities do you care about： cultural and entertainment facilities (activity room, chess and card room)	30.Which facilities do you care about： cleaning equipment (washing machine, washing articles)	30.Which facilities do you care about： nutritional catering facilities (catering tools, communal kitchen)	30.Which facilities do you care about：building facilities (Barrier-free lift)	3no other options.Which facilities do you care about：others
woman	>80 years	junior college	Rural farmers	Married	A son	Enterprise employees	None	Agency institution	≥10000 RMB	Healthy	You can take care of yourself	No pain at all	Energy is ok	rarely	Never appear	Never appear	Never appear	Sometimes appear	Heard about it but didn't understand it	Home care					No need for home care	Community care is needed	No institutional care is required	No need mutual pension	No alternative	supportive	≥4000	Willing to	oneself	Need these	You don't need these	You don't need these	You don't need these	You don't need these	You don't need these	You don't need these	You don't need these	no other options
woman	60-65 years	junior college	Urban residents	Married	A son	Institutions	Town worker medical insurance	Agency institution	≥10000 RMB	General	You can take care of yourself	A little bit sore	Better energy	Sometimes appear	Sometimes appear	rarely	Sometimes appear	Sometimes appear	Heard about it but didn't understand it	Home care					Requires home care	No need for community care	No institutional care is required	No need mutual pension	No alternative	supportive	2000-2999	Willing to	children	Need these	You don't need these	You don't need these	You don't need these	You don't need these	You don't need these	You don't need these	You don't need these	no other options
woman	60-65 years	junior college	Urban residents	Married	A son	Institutions	Town worker medical insurance	Agency institution	6000-9999 RMB	Healthy	You can take care of yourself	A little bit sore	Better energy	Never appear	Never appear	Never appear	Never appear	Never appear	Heard about it but didn't understand it	Other	general	general	general	general	Requires home care	Community care is needed	Institutional care is required	Need mutual pension	No alternative	supportive	3000-3999	Very willing to	oneself	Need these	need these	need these	need these	need these	need these	need these	need these	no other options
woman	60-65 years	bachelor degree or above	Urban residents	Married	A son	Institutions	Urban residents medical treatment	Agency institution	≥10000 RMB	General	You can take care of yourself	A little bit sore	Energy is ok	rarely	Sometimes appear	rarely	Sometimes appear	Sometimes appear	Heard about it but didn't understand it	Home care					Requires home care	Community care is needed	Institutional care is required	Need mutual pension	No alternative	supportive	1000-1999	general	oneself	You don't need these	You don't need these	need these	You don't need these	You don't need these	You don't need these	You don't need these	You don't need these	no other options
man	60-65 years	junior college	Urban residents	Married	A daughter	Enterprise employees	endowment insurance、Medical insurance	Urban workers or urban and rural residents	6000-9999 RMB000-5999 RMB	Healthy	You can take care of yourself	No pain at all	Better energy	Never appear	Never appear	Never appear	Never appear	Never appear	Heard about it but didn't understand it	Home care					Requires home care	No need for community care	No institutional care is required	No need mutual pension	No alternative	supportive	1000-1999	Willing to	spouse	Need these	need these	need these	need these	need these	need these	need these	You don't need these	no other options
man	60-65 years	bachelor degree or above	Urban residents	Married	A son	Enterprise employees	Town worker medical insurance	Urban workers or urban and rural residents	≥10000 RMB	Excellent	You can take care of yourself	No pain at all	Full of energy	Never appear	Never appear	Never appear	Never appear	Never appear	Know	Home care					Requires home care	No need for community care	No institutional care is required	No need mutual pension	No alternative	Excellent supportive	1000-1999	Very willing to	oneself	You don't need these	need these	You don't need these	You don't need these	You don't need these	You don't need these	You don't need these	You don't need these	no other options
man	60-65 years	bachelor degree or above	Urban residents	Married	A daughter	Civil servants	endowment insurance、Medical insurance	Agency institution	≥10000 RMB	Excellent	You can take care of yourself	No pain at all	Full of energy	Never appear	Never appear	Never appear	Never appear	Never appear	Know	Home care					Requires home care	No need for community care	No institutional care is required	No need mutual pension	No alternative	Excellent supportive	≥4000	Willing to	Other family members	You don't need these	need these	need these	need these	need these	need these	need these	need these	no other options
man	71-75 years	Junior high school	Urban residents	Married	Two sons	Institutions	Urban residents medical treatment	Agency institution	6000-9999 RMB000-5999 RMB	General	In most cases, you can do it yourself	A little bit sore	Energy is ok	rarely	rarely	rarely	rarely	rarely	Know	Home care					Requires home care	No need for community care	No institutional care is required	No need mutual pension	No alternative	supportive	1000-1999	general	oneself	Need these	need these	need these	need these	need these	You don't need these	You don't need these	You don't need these	no other options
woman	60-65 years	Junior high school	Rural farmers	Married	A daughter	Self-employed	New rural cooperative	Urban workers or urban and rural residents	6000-9999 RMB	Healthy	You can take care of yourself	No pain at all	Full of energy	Never appear	Never appear	Never appear	Never appear	Never appear	Know very well	Home care					Requires home care	No need for community care	No institutional care is required	No need mutual pension	No alternative	Excellent supportive	0-999	Very willing to	children	You don't need these	need these	You don't need these	You don't need these	You don't need these	You don't need these	You don't need these	You don't need these	no other options
woman	76-80 years	bachelor degree or above	Rural farmers	Married	Two sons	Institutions	Town worker medical insurance	Agency institution	6000-9999 RMB	Excellent	You can take care of yourself	A little bit sore	Full of energy	Sometimes appear	Sometimes appear	Sometimes appear	Sometimes appear	Sometimes appear	Know	Home care					Requires home care	Community care is needed	Institutional care is required	Need mutual pension	No alternative	Excellent supportive	1000-1999	Very willing to	spouse	Need these	need these	need these	need these	need these	need these	need these	need these	no other options
man	76-80 years	Junior high school	Rural farmers	Married	Two sons	Farmers	New rural cooperative	Land expropriated farmers business	<6000-9999 RMB000 RMB	General	In most cases, you can do it yourself	A little bit sore	Better energy	Sometimes appear	Never appear	Never appear	Never appear	Sometimes appear	Never heard	Other	agree	general	agree	general	Requires home care	Community care is needed	Institutional care is required	No need mutual pension	No alternative	supportive	1000-1999	general	oneself	You don't need these	need these	need these	need these	need these	You don't need these	You don't need these	You don't need these	no other options
man	66-70 years	Primary school	Urban residents	Married	Two sons	Farmers	Urban residents medical treatment	Urban workers or urban and rural residents	<6000-9999 RMB000 RMB	Healthy	You can take care of yourself	No pain at all	Full of energy	Never appear	Never appear	Never appear	Never appear	Never appear	Know	Other	agree	Couldn't agree more	general	agree	Requires home care	No need for community care	No institutional care is required	No need mutual pension	No alternative	Excellent supportive	0-999	Very willing to	children	Need these	need these	You don't need these	need these	You don't need these	You don't need these	need these	You don't need these	no other options
woman	71-75 years	Primary school the following	Rural farmers	Married	Two sons	Farmers	New rural cooperative	None	<6000-9999 RMB000 RMB	General	You can take care of yourself	A little bit sore	Energy is ok	Sometimes appear	rarely	rarely	rarely	Sometimes appear	Heard about it but didn't understand it	Home care					Requires home care	No need for community care	No institutional care is required	No need mutual pension	No alternative	supportive	0-999	Willing to	oneself	You don't need these	You don't need these	You don't need these	You don't need these	You don't need these	need these	need these	You don't need these	no other options
woman	76-80 years	Junior high school	Rural farmers	Married	Two sons	Institutions	New rural cooperative	Urban workers or urban and rural residents	6000-9999 RMB000-5999 RMB	General	In most cases, you can do it yourself	A little bit sore	Better energy	rarely	rarely	rarely	rarely	rarely	Know very well	Institutional care	agree	agree	agree	agree	Requires home care	No need for community care	No institutional care is required	No need mutual pension	No alternative	supportive	1000-1999	general	oneself	You don't need these	You don't need these	need these	You don't need these	You don't need these	You don't need these	You don't need these	You don't need these	no other options
man	60-65 years	Junior high school	Rural farmers	Married	Two sons	Farmers	New rural cooperative	Land expropriated farmers business	<6000-9999 RMB000 RMB	Bad	In most cases, you can do it yourself	A little bit sore	Better energy	rarely	rarely	rarely	rarely	rarely	Heard about it but didn't understand it	Home care					Requires home care	No need for community care	Institutional care is required	No need mutual pension	No alternative	supportive	0-999	Very willing to	children	You don't need these	need these	need these	need these	You don't need these	You don't need these	You don't need these	need these	no other options
woman	60-65 years	Primary school the following	Rural farmers	Married	Two sons	Farmers	New rural cooperative	Land expropriated farmers business	6000-9999 RMB000-5999 RMB	Bad	You can take care of yourself	A little bit sore	Energy is ok	Sometimes appear	Never appear	Never appear	Sometimes appear	Sometimes appear	Never heard	Other	general	general	general	general	Requires home care	Community care is needed	Institutional care is required	No need mutual pension	No alternative	General	2000-2999	Willing to	oneself	You don't need these	need these	need these	need these	need these	need these	need these	need these	no other options
man	66-70 years	Junior high school	Urban residents	Married	Two sons	Enterprise employees	Urban residents medical treatment	Business	<6000-9999 RMB000 RMB	Excellent	You can take care of yourself	No pain at all	Full of energy	Never appear	Never appear	Never appear	Never appear	Never appear	Know very well	Home care					Requires home care	No need for community care	No institutional care is required	No need mutual pension	No alternative	supportive	3000-3999	Very willing to	children	Need these	You don't need these	You don't need these	You don't need these	You don't need these	You don't need these	You don't need these	You don't need these	no other options
man	76-80 years	Junior high school	Urban residents	Married	Two sons	Enterprise employees	Town worker medical insurance	Agency institution	≥10000 RMB	Excellent	You can take care of yourself	A little bit sore	Full of energy	Never appear	Never appear	Never appear	Never appear	Never appear	Know very well	Home care					Requires home care	No need for community care	No institutional care is required	No need mutual pension	No alternative	Excellent supportive	1000-1999	Very willing to	oneself	You don't need these	need these	You don't need these	You don't need these	You don't need these	You don't need these	You don't need these	You don't need these	no other options
woman	>80 years	Primary school	Rural farmers	Divorced	Two sons	Farmers	New rural cooperative	Urban workers or urban and rural residents	6000-9999 RMB	General	In most cases, you can do it yourself	Moderate pain	Better energy	rarely	rarely	Sometimes appear	Sometimes appear	rarely	Heard about it but didn't understand it	Home care					Requires home care	No need for community care	No institutional care is required	No need mutual pension	No alternative	General	2000-2999	Willing to	oneself	Need these	need these	You don't need these	need these	You don't need these	need these	need these	need these	no other options
woman	71-75 years	Primary school	Rural farmers	Married	Two sons	Migrant workers	New rural cooperative	Urban workers or urban and rural residents	≥10000 RMB	Healthy	You can take care of yourself	A little bit sore	Energy is ok	Never appear	Never appear	Never appear	Never appear	rarely	Heard about it but didn't understand it	Home care					No need for home care	Community care is needed	No institutional care is required	No need mutual pension	No alternative	supportive	1000-1999	Willing to	spouse	You don't need these	You don't need these	You don't need these	need these	You don't need these	You don't need these	You don't need these	You don't need these	no other options
woman	>80 years	Primary school the following	Urban residents	Married	Two sons	Others	New rural cooperative	Business	<6000-9999 RMB000 RMB	General	In most cases, you can do it yourself	Moderate pain	Energy is ok	rarely	rarely	rarely	rarely	rarely	Never heard	Community care	agree	general	agree	agree	No need for home care	Community care is needed	No institutional care is required	No need mutual pension	No alternative	supportive	0-999	general	spouse	You don't need these	need these	You don't need these	You don't need these	You don't need these	You don't need these	You don't need these	You don't need these	no other options
woman	60-65 years	Primary school the following	Rural farmers	Married	A son	Farmers	New rural cooperative	Land expropriated farmers business	<6000-9999 RMB000 RMB	Healthy	You can take care of yourself	A little bit sore	Better energy	Sometimes appear	rarely	Never appear	rarely	rarely	Heard about it but didn't understand it	Home care					Requires home care	No need for community care	No institutional care is required	No need mutual pension	No alternative	Excellent supportive	0-999	general	oneself	Need these	need these	need these	need these	need these	need these	need these	need these	other options
woman	60-65 years	high school	Urban residents	Married	A daughter	Enterprise employees	Town worker medical insurance	Urban workers or urban and rural residents	6000-9999 RMB	Healthy	You can take care of yourself	No pain at all	Better energy	rarely	rarely	Never appear	Never appear	rarely	Heard about it but didn't understand it	Home care					Requires home care	No need for community care	No institutional care is required	No need mutual pension	No alternative	supportive	1000-1999	Willing to	oneself	Need these	need these	need these	need these	need these	need these	need these	need these	no other options
woman	60-65 years	Primary school	Urban residents	Single	A son	Civil servants	Commercial insurance	Agency institution	6000-9999 RMB000-5999 RMB	General	In most cases, you can do it yourself	No pain at all	Better energy	rarely	rarely	rarely	Sometimes appear	Sometimes appear	Know very well	Community care	agree	general	agree	agree	Requires home care	No need for community care	No institutional care is required	No need mutual pension	No alternative	General	1000-1999	Very willing to	oneself	Need these	You don't need these	You don't need these	You don't need these	You don't need these	You don't need these	You don't need these	You don't need these	no other options
woman	71-75 years	Primary school the following	Rural farmers	Married	A daughter	Farmers	None	None	<6000-9999 RMB000 RMB	General	You can take care of yourself	A little bit sore	Energy is ok	often appear	often appear	often appear	Sometimes appear	Sometimes appear	Heard about it but didn't understand it	Home care					Requires home care	No need for community care	No institutional care is required	No need mutual pension	No alternative	General	1000-1999	Very willing to	oneself	Need these	need these	need these	need these	need these	need these	need these	need these	no other options
woman	>80 years	Junior high school	Rural farmers	Married	Two sons	Farmers	New rural cooperative	None	6000-9999 RMB000-5999 RMB	General	In most cases, you can do it yourself	A little bit sore	Energy is ok	Sometimes appear	Sometimes appear	Sometimes appear	Sometimes appear	Sometimes appear	Never heard	Home care					No need for home care	Community care is needed	Institutional care is required	Need mutual pension	No alternative	Excellent supportive	2000-2999	Very willing to	children	Need these	need these	need these	need these	need these	You don't need these	You don't need these	You don't need these	no other options
man	>80 years	Junior high school	Urban residents	Married	Two sons	Migrant workers	None	None	6000-9999 RMB000-5999 RMB	General	In most cases, you can do it yourself	A little bit sore	Better energy	rarely	rarely	rarely	Sometimes appear	Never appear	Never heard	Home care					Requires home care	No need for community care	Institutional care is required	No need mutual pension	No alternative	supportive	0-999	Willing to	Other family members	You don't need these	need these	need these	need these	You don't need these	need these	You don't need these	need these	no other options
man	71-75 years	technical secondary school	Rural farmers	Married	childless	Farmers	New rural cooperative	Business	6000-9999 RMB000-5999 RMB	Excellent	In most cases, you can do it yourself	A little bit sore	Energy is ok	often appear	Sometimes appear	often appear	Always appear	rarely	Know	Home care					No need for home care	Community care is needed	Institutional care is required	Need mutual pension	No alternative	General	2000-2999	Willing to	oneself	You don't need these	You don't need these	need these	You don't need these	need these	You don't need these	You don't need these	You don't need these	no other options
man	66-70 years	Junior high school	Urban residents	Married	A daughter	Self-employed	Urban residents medical treatment	Urban workers or urban and rural residents	6000-9999 RMB000-5999 RMB	General	In most cases, you can do it yourself	A little bit sore	Energy is ok	Never appear	Never appear	rarely	Never appear	Never appear	Heard about it but didn't understand it	Mutual endowment	agree	agree	agree	agree	Requires home care	No need for community care	No institutional care is required	No need mutual pension	No alternative	General	0-999	Willing to	children	Need these	need these	need these	You don't need these	You don't need these	You don't need these	You don't need these	You don't need these	no other options
man	71-75 years	Primary school the following	Rural farmers	Married	childless	Farmers	Urban residents medical treatment	None	6000-9999 RMB000-5999 RMB	Excellent	In most cases, you can do it yourself	A little bit sore	Better energy	rarely	Never appear	rarely	Sometimes appear	Sometimes appear	Heard about it but didn't understand it	Other	agree	Couldn't agree more	agree	agree	Requires home care	No need for community care	No institutional care is required	No need mutual pension	No alternative	supportive	1000-1999	Willing to	oneself	Need these	need these	You don't need these	You don't need these	need these	You don't need these	need these	You don't need these	no other options
man	60-65 years	high school	Urban residents	Married	A daughter	Civil servants	endowment insurance、Medical insurance	Business	≥10000 RMB	Excellent	In most cases, you can do it yourself	No pain at all	Better energy	rarely	Never appear	Never appear	Never appear	Never appear	Know	Home care					No need for home care	Community care is needed	Institutional care is required	No need mutual pension	No alternative	supportive	3000-3999	Willing to	oneself	You don't need these	need these	You don't need these	need these	need these	You don't need these	need these	You don't need these	no other options
woman	66-70 years	Primary school the following	Rural farmers	Married	Two sons	Institutions	Commercial insurance	Business	≥10000 RMB	Healthy	In most cases, you can do it yourself	No pain at all	Better energy	often appear	often appear	Sometimes appear	rarely	rarely	Know	Community care	agree	general	general	agree	No need for home care	No need for community care	Institutional care is required	Need mutual pension	No alternative	General	1000-1999	Very willing to	children	You don't need these	You don't need these	You don't need these	need these	need these	You don't need these	need these	need these	no other options
man	71-75 years	Junior high school	Urban residents	Married	A son	Enterprise employees	Commercial insurance	Business	6000-9999 RMB	Healthy	In most cases, you can do it yourself	No pain at all	Better energy	Sometimes appear	Sometimes appear	rarely	rarely	Never appear	Know	Home care					Requires home care	Community care is needed	No institutional care is required	Need mutual pension	No alternative	supportive	1000-1999	Very willing to	oneself	Need these	need these	need these	need these	need these	need these	need these	need these	no other options
man	66-70 years	Primary school	Rural farmers	Married	A son and a daughter	Farmers	New rural cooperative	Land expropriated farmers business	6000-9999 RMB000-5999 RMB	Healthy	In most cases, you can do it yourself	No pain at all	Better energy	Sometimes appear	Sometimes appear	Sometimes appear	rarely	rarely	Heard about it but didn't understand it	Home care					Requires home care	Community care is needed	Institutional care is required	Need mutual pension	No alternative	Excellent supportive	1000-1999	Willing to	oneself	Need these	need these	need these	need these	need these	need these	You don't need these	need these	no other options
woman	60-65 years	technical secondary school	Urban residents	Married	A son	Institutions	Town worker medical insurance	Business	≥10000 RMB	Healthy	You can take care of yourself	No pain at all	Full of energy	Sometimes appear	Never appear	Never appear	rarely	rarely	Know	Institutional care	Couldn't agree more	Couldn't agree more	Couldn't agree more	agree	Requires home care	Community care is needed	Institutional care is required	No need mutual pension	No alternative	supportive	3000-3999	Very willing to	oneself	Need these	need these	You don't need these	need these	need these	You don't need these	need these	You don't need these	no other options
woman	>80 years	Primary school	Urban residents	Married	8	Enterprise employees	Commercial insurance	Urban workers or urban and rural residents	6000-9999 RMB000-5999 RMB	Healthy	In most cases, you can do it yourself	A little bit sore	Better energy	often appear	often appear	often appear	often appear	often appear	Know	Community care	Couldn't agree more	agree	agree	agree	No need for home care	No need for community care	Institutional care is required	No need mutual pension	No alternative	supportive	1000-1999	general	oneself	You don't need these	You don't need these	You don't need these	need these	You don't need these	You don't need these	need these	You don't need these	no other options
man	76-80 years	Primary school the following	Rural farmers	Divorced	0	Self-employed	endowment insurance、Medical insurance	None	6000-9999 RMB000-5999 RMB	Healthy	In most cases, you can do it yourself	Moderate pain	Energy is ok	Sometimes appear	Sometimes appear	Sometimes appear	often appear	often appear	Know	Home care					No need for home care	Community care is needed	Institutional care is required	No need mutual pension	No alternative	Excellent supportive	1000-1999	Very reluctant	oneself	Need these	need these	need these	need these	You don't need these	You don't need these	You don't need these	You don't need these	no other options
man	66-70 years	Primary school	Rural farmers	Married	childless	Migrant workers	Commercial insurance	Business	6000-9999 RMB	General	In most cases, you can do it yourself	Moderate pain	Energy is ok	Sometimes appear	Sometimes appear	rarely	Sometimes appear	Sometimes appear	Know	Community care	general	general	general	general	Requires home care	Community care is needed	Institutional care is required	Need mutual pension	No alternative	Excellent supportive	1000-1999	general	oneself	You don't need these	need these	need these	need these	need these	You don't need these	You don't need these	You don't need these	no other options
man	66-70 years	technical secondary school	Urban residents	Married	Two sons	Institutions	Urban residents medical treatment	Urban workers or urban and rural residents	6000-9999 RMB	Excellent	You can take care of yourself	No pain at all	Better energy	rarely	rarely	rarely	Never appear	rarely	Know	Home care					Requires home care	Community care is needed	Institutional care is required	Need mutual pension	No alternative	Excellent supportive	2000-2999	Very willing to	oneself	Need these	need these	need these	need these	You don't need these	You don't need these	You don't need these	You don't need these	no other options
woman	66-70 years	Junior high school	Urban residents	Divorced	A son	Farmers	New rural cooperative	Urban workers or urban and rural residents	≥10000 RMB	General	In most cases, you can do it yourself	No pain at all	Better energy	often appear	rarely	Never appear	Never appear	Never appear	Know	Community care	agree	general	agree	agree	Requires home care	No need for community care	Institutional care is required	No need mutual pension	No alternative	supportive	3000-3999	general	oneself	You don't need these	need these	You don't need these	need these	You don't need these	need these	You don't need these	need these	no other options
woman	66-70 years	Primary school	Urban residents	Divorced	Two daughters	Institutions	Commercial insurance	Urban workers or urban and rural residents	6000-9999 RMB	General	Need someone to take care of	A lot of pain	Better energy	Sometimes appear	often appear	Sometimes appear	often appear	often appear	Know	Community care	agree	general	agree	agree	No need for home care	No need for community care	Institutional care is required	Need mutual pension	No alternative	supportive	1000-1999	Willing to	oneself	You don't need these	You don't need these	need these	need these	You don't need these	You don't need these	You don't need these	need these	no other options
woman	71-75 years	Primary school	Rural farmers	Divorced	Two sons	Farmers	New rural cooperative	Urban workers or urban and rural residents	6000-9999 RMB	General	In most cases, you can do it yourself	Moderate pain	Low energy	Always appear	Sometimes appear	often appear	Sometimes appear	rarely	Know	Community care	agree	agree	general	agree	Requires home care	Community care is needed	Institutional care is required	Need mutual pension	No alternative	Excellent supportive	0-999	general	children	You don't need these	need these	You don't need these	need these	You don't need these	You don't need these	You don't need these	You don't need these	no other options
woman	60-65 years	Junior high school	Rural farmers	Married	A daughter	Self-employed	New rural cooperative	Urban workers or urban and rural residents	≥10000 RMB	Excellent	You can take care of yourself	A little bit sore	Better energy	rarely	rarely	Never appear	often appear	rarely	Know	Home care					Requires home care	Community care is needed	No institutional care is required	Need mutual pension	No alternative	supportive	1000-1999	Willing to	Other family members	You don't need these	You don't need these	need these	You don't need these	You don't need these	You don't need these	need these	You don't need these	no other options
woman	66-70 years	Junior high school	Urban residents	Divorced	childless	Enterprise employees	Urban residents medical treatment	Urban workers or urban and rural residents	≥10000 RMB	Excellent	In most cases, you can do it yourself	A little bit sore	Full of energy	often appear	rarely	Never appear	Never appear	rarely	Know	Home care					No need for home care	No need for community care	Institutional care is required	No need mutual pension	Other options	Excellent supportive	≥4000	Very willing to	children	You don't need these	need these	You don't need these	need these	You don't need these	You don't need these	You don't need these	You don't need these	no other options
man	71-75 years	Junior high school	Urban residents	Married	childless	Self-employed	Commercial insurance	Urban workers or urban and rural residents	6000-9999 RMB	Healthy	You can take care of yourself	A little bit sore	Better energy	Sometimes appear	Sometimes appear	rarely	rarely	rarely	Heard about it but didn't understand it	Home care					Requires home care	No need for community care	No institutional care is required	Need mutual pension	No alternative	Excellent supportive	1000-1999	Willing to	oneself	Need these	need these	need these	need these	need these	You don't need these	You don't need these	You don't need these	no other options
man	71-75 years	Junior high school	Urban residents	Married	A daughter	Self-employed	Urban residents medical treatment	Urban workers or urban and rural residents	6000-9999 RMB	Healthy	You can take care of yourself	No pain at all	Better energy	Sometimes appear	Sometimes appear	Sometimes appear	rarely	rarely	Know	Home care					Requires home care	No need for community care	No institutional care is required	Need mutual pension	No alternative	Excellent supportive	1000-1999	Willing to	oneself	Need these	need these	You don't need these	need these	need these	You don't need these	need these	need these	no other options
man	71-75 years	Junior high school	Urban residents	Married	Two sons	Institutions	Commercial insurance	Business	6000-9999 RMB	Healthy	You can take care of yourself	No pain at all	Energy is ok	Sometimes appear	Sometimes appear	Sometimes appear	Sometimes appear	rarely	Know	Home care					Requires home care	No need for community care	Institutional care is required	Need mutual pension	No alternative	Excellent supportive	1000-1999	Very willing to	oneself	Need these	need these	need these	need these	need these	You don't need these	You don't need these	You don't need these	no other options
man	66-70 years	Junior high school	Urban residents	Married	A daughter	Self-employed	Urban residents medical treatment	Urban workers or urban and rural residents	6000-9999 RMB	Healthy	You can take care of yourself	A little bit sore	Full of energy	Sometimes appear	Sometimes appear	rarely	rarely	rarely	Know	Home care					Requires home care	Community care is needed	Institutional care is required	No need mutual pension	No alternative	Excellent supportive	1000-1999	Willing to	oneself	Need these	need these	need these	You don't need these	You don't need these	You don't need these	You don't need these	You don't need these	no other options
man	60-65 years	Junior high school	Urban residents	Married	Two sons	Migrant workers	Urban residents medical treatment	None	6000-9999 RMB	Healthy	You can take care of yourself	No pain at all	Better energy	Never appear	Never appear	Never appear	Never appear	Never appear	Heard about it but didn't understand it	Mutual endowment	general	Couldn't agree more	agree	agree	No need for home care	No need for community care	Institutional care is required	No need mutual pension	No alternative	General	0-999	Very willing to	spouse	You don't need these	You don't need these	You don't need these	You don't need these	need these	You don't need these	You don't need these	You don't need these	no other options
woman	71-75 years	Primary school	Rural farmers	Married	Two sons	Self-employed	New rural cooperative	Business	6000-9999 RMB000-5999 RMB	Bad	In most cases, you can do it yourself	Moderate pain	Low energy	Sometimes appear	rarely	often appear	often appear	Sometimes appear	Never heard	Other	general	general	Partial disagree	general	No need for home care	Community care is needed	No institutional care is required	No need mutual pension	No alternative	Don't support	0-999	general	friend	You don't need these	need these	You don't need these	You don't need these	You don't need these	You don't need these	You don't need these	You don't need these	no other options
man	>80 years	Primary school the following	Rural farmers	Married	9	Farmers	Urban residents medical treatment	Agency institution	6000-9999 RMB	Excellent	In most cases, you can do it yourself	A little bit sore	Better energy	Never appear	Never appear	Never appear	Never appear	Never appear	Know	Home care					No need for home care	Community care is needed	Institutional care is required	Need mutual pension	No alternative	General	3000-3999	Very willing to	oneself	You don't need these	need these	You don't need these	need these	You don't need these	You don't need these	You don't need these	need these	no other options
woman	71-75 years	Primary school	Urban residents	Married	A daughter	Enterprise employees	Commercial insurance	Agency institution	≥10000 RMB	Healthy	You can take care of yourself	A little bit sore	Full of energy	rarely	rarely	Never appear	Never appear	Never appear	Know	Home care					Requires home care	No need for community care	No institutional care is required	No need mutual pension	No alternative	supportive	2000-2999	Willing to	oneself	Need these	You don't need these	You don't need these	You don't need these	You don't need these	You don't need these	You don't need these	need these	no other options
man	71-75 years	Primary school	Urban residents	Divorced	A daughter	Migrant workers	Urban residents medical treatment	None	<6000-9999 RMB000 RMB	Excellent	You can take care of yourself	No pain at all	Full of energy	Never appear	Never appear	Never appear	Never appear	Never appear	Know	Home care					No need for home care	No need for community care	Institutional care is required	Need mutual pension	No alternative	supportive	1000-1999	Willing to	children	Need these	You don't need these	You don't need these	need these	need these	You don't need these	You don't need these	You don't need these	no other options
man	60-65 years	high school	Urban residents	Divorced	Two sons	Institutions	Town worker medical insurance	Agency institution	6000-9999 RMB	Healthy	In most cases, you can do it yourself	No pain at all	Better energy	Never appear	Never appear	rarely	Sometimes appear	Sometimes appear	Know	Home care					No need for home care	Community care is needed	Institutional care is required	No need mutual pension	No alternative	Excellent supportive	1000-1999	Willing to	children	Need these	You don't need these	You don't need these	You don't need these	need these	You don't need these	need these	You don't need these	no other options
woman	60-65 years	Primary school	Urban residents	Widowed	Two sons	Self-employed	endowment insurance、Medical insurance	Business	6000-9999 RMB000-5999 RMB	General	In most cases, you can do it yourself	A little bit sore	Energy is ok	Never appear	Never appear	rarely	rarely	Sometimes appear	Never heard	Home care					No need for home care	No need for community care	Institutional care is required	No need mutual pension	No alternative	supportive	0-999	Very willing to	children	Need these	You don't need these	You don't need these	You don't need these	need these	You don't need these	You don't need these	You don't need these	no other options
man	71-75 years	Primary school the following	Rural farmers	Married	Two sons	Farmers	New rural cooperative	Land expropriated farmers business	6000-9999 RMB	Healthy	In most cases, you can do it yourself	No pain at all	Better energy	rarely	rarely	rarely	Sometimes appear	rarely	Heard about it but didn't understand it	Home care					Requires home care	No need for community care	No institutional care is required	Need mutual pension	No alternative	supportive	1000-1999	Willing to	oneself	Need these	need these	need these	You don't need these	need these	You don't need these	need these	You don't need these	no other options
woman	71-75 years	Junior high school	Urban residents	Married	A son	Institutions	Commercial insurance	Business	6000-9999 RMB	Excellent	In most cases, you can do it yourself	No pain at all	Full of energy	Sometimes appear	Sometimes appear	rarely	rarely	rarely	Know	Home care					Requires home care	Community care is needed	No institutional care is required	Need mutual pension	No alternative	Excellent supportive	2000-2999	Very willing to	oneself	Need these	need these	need these	need these	need these	You don't need these	You don't need these	You don't need these	no other options
man	71-75 years	Junior high school	Urban residents	Married	Two sons	Institutions	Commercial insurance	Urban workers or urban and rural residents	6000-9999 RMB	Bad	In most cases, you can do it yourself	No pain at all	Full of energy	often appear	rarely	rarely	rarely	rarely	Know very well	Home care					Requires home care	Community care is needed	Institutional care is required	Need mutual pension	No alternative	Excellent supportive	2000-2999	Very willing to	oneself	Need these	need these	need these	need these	You don't need these	You don't need these	You don't need these	You don't need these	no other options
man	71-75 years	Junior high school	Urban residents	Married	Two sons	Self-employed	Urban residents medical treatment	Urban workers or urban and rural residents	6000-9999 RMB	General	In most cases, you can do it yourself	A little bit sore	Better energy	often appear	Sometimes appear	rarely	rarely	rarely	Know	Home care					Requires home care	Community care is needed	Institutional care is required	Need mutual pension	No alternative	Excellent supportive	1000-1999	Willing to	oneself	Need these	need these	need these	You don't need these	need these	You don't need these	need these	need these	no other options
man	66-70 years	Primary school	Urban residents	Married	A daughter	Self-employed	Urban residents medical treatment	Urban workers or urban and rural residents	6000-9999 RMB	Healthy	In most cases, you can do it yourself	No pain at all	Energy is ok	Sometimes appear	Sometimes appear	rarely	rarely	rarely	Know	Home care					Requires home care	Community care is needed	Institutional care is required	Need mutual pension	No alternative	Excellent supportive	2000-2999	Very willing to	oneself	Need these	need these	need these	You don't need these	need these	need these	You don't need these	You don't need these	no other options
man	71-75 years	Junior high school	Urban residents	Married	Two sons	Self-employed	Commercial insurance	Urban workers or urban and rural residents	6000-9999 RMB000-5999 RMB	General	In most cases, you can do it yourself	Moderate pain	Better energy	Sometimes appear	rarely	rarely	rarely	rarely	Know	Home care					Requires home care	Community care is needed	No institutional care is required	No need mutual pension	No alternative	Excellent supportive	1000-1999	Very willing to	oneself	Need these	need these	need these	need these	need these	You don't need these	You don't need these	You don't need these	no other options
man	71-75 years	Junior high school	Urban residents	Married	Two sons	Self-employed	Urban residents medical treatment	Urban workers or urban and rural residents	6000-9999 RMB	General	Need someone to take care of	A little bit sore	Energy is ok	Sometimes appear	Sometimes appear	rarely	Sometimes appear	rarely	Know	Community care	agree	agree	general	agree	Requires home care	Community care is needed	Institutional care is required	No need mutual pension	No alternative	Excellent supportive	2000-2999	Very willing to	oneself	You don't need these	need these	need these	You don't need these	need these	need these	You don't need these	need these	no other options
man	66-70 years	Junior high school	Urban residents	Married	A son and a daughter	Self-employed	Commercial insurance	Urban workers or urban and rural residents	6000-9999 RMB	Healthy	In most cases, you can do it yourself	No pain at all	Better energy	Sometimes appear	Sometimes appear	rarely	rarely	Never appear	Know	Home care					Requires home care	Community care is needed	No institutional care is required	Need mutual pension	Other options	supportive	1000-1999	Willing to	oneself	Need these	You don't need these	need these	need these	need these	You don't need these	You don't need these	need these	no other options
man	71-75 years	Junior high school	Urban residents	Married	A daughter	Enterprise employees	Urban residents medical treatment	Business	≥10000 RMB	Excellent	You can take care of yourself	A little bit sore	Better energy	Never appear	Never appear	rarely	rarely	rarely	Heard about it but didn't understand it	Home care					Requires home care	Community care is needed	No institutional care is required	Need mutual pension	No alternative	supportive	2000-2999	Willing to	spouse	You don't need these	need these	You don't need these	need these	You don't need these	You don't need these	You don't need these	You don't need these	no other options
man	66-70 years	Primary school	Rural farmers	Divorced	others	Farmers	New rural cooperative	Land expropriated farmers business	6000-9999 RMB000-5999 RMB	Healthy	In most cases, you can do it yourself	Moderate pain	Energy is ok	often appear	Sometimes appear	often appear	Always appear	often appear	Know	Community care	agree	Couldn't agree more	agree	general	No need for home care	Community care is needed	No institutional care is required	Need mutual pension	No alternative	General	1000-1999	general	children	You don't need these	You don't need these	You don't need these	need these	You don't need these	need these	You don't need these	You don't need these	no other options
woman	66-70 years	high school	Urban residents	Married	A son and a daughter	Institutions	Commercial insurance	Agency institution	≥10000 RMB	Excellent	You can take care of yourself	A little bit sore	Better energy	Never appear	Sometimes appear	rarely	Sometimes appear	rarely	Know	Community care	general	agree	Couldn't agree more	agree	No need for home care	Community care is needed	Institutional care is required	No need mutual pension	No alternative	Excellent supportive	≥4000	Very willing to	oneself	Need these	You don't need these	You don't need these	You don't need these	need these	You don't need these	You don't need these	You don't need these	no other options
woman	>80 years	Primary school the following	Rural farmers	Divorced	others	Farmers	None	None	≥10000 RMB	Healthy	In most cases, you can do it yourself	Moderate pain	Energy is ok	Always appear	Sometimes appear	often appear	Sometimes appear	rarely	Know	Home care					No need for home care	Community care is needed	Institutional care is required	No need mutual pension	No alternative	supportive	2000-2999	general	children	You don't need these	need these	You don't need these	need these	You don't need these	need these	need these	You don't need these	no other options
man	71-75 years	Primary school	Rural farmers	Divorced	Two daughters	Self-employed	New rural cooperative	Urban workers or urban and rural residents	6000-9999 RMB000-5999 RMB	General	In most cases, you can do it yourself	Moderate pain	Energy is ok	often appear	Always appear	Sometimes appear	often appear	Always appear	Know	Home care					No need for home care	Community care is needed	Institutional care is required	Need mutual pension	No alternative	General	0-999	general	children	You don't need these	need these	You don't need these	You don't need these	You don't need these	You don't need these	You don't need these	need these	no other options
man	>80 years	bachelor degree or above	Rural farmers	Married	Two daughters	Civil servants	Urban residents medical treatment	Urban workers or urban and rural residents	≥10000 RMB	General	You can take care of yourself	A little bit sore	Energy is ok	Always appear	Sometimes appear	rarely	Sometimes appear	Sometimes appear	Know	Home care					Requires home care	No need for community care	No institutional care is required	No need mutual pension	No alternative	supportive	2000-2999	Willing to	oneself	Need these	need these	need these	need these	need these	You don't need these	You don't need these	You don't need these	no other options
woman	66-70 years	technical secondary school	Rural farmers	Married	Two daughters	Farmers	New rural cooperative	Urban workers or urban and rural residents	6000-9999 RMB	Healthy	You can take care of yourself	A little bit sore	Better energy	Sometimes appear	Sometimes appear	rarely	rarely	rarely	Know	Home care					No need for home care	Community care is needed	No institutional care is required	No need mutual pension	No alternative	Excellent supportive	2000-2999	Very willing to	oneself	Need these	need these	You don't need these	need these	need these	You don't need these	You don't need these	You don't need these	no other options
woman	71-75 years	Junior high school	Rural farmers	Married	Two daughters	Farmers	New rural cooperative	Urban workers or urban and rural residents	≥10000 RMB	General	In most cases, you can do it yourself	Moderate pain	Energy is ok	Sometimes appear	Never appear	Never appear	Never appear	Never appear	Never heard	Home care					Requires home care	No need for community care	No institutional care is required	No need mutual pension	No alternative	General	0-999	Willing to	spouse	Need these	You don't need these	need these	need these	You don't need these	You don't need these	You don't need these	need these	no other options
man	60-65 years	Junior high school	Rural farmers	Married	A son	Farmers	New rural cooperative	Urban workers or urban and rural residents	6000-9999 RMB000-5999 RMB	Healthy	You can take care of yourself	A little bit sore	Better energy	rarely	Never appear	Never appear	Never appear	Never appear	Never heard	Home care					Requires home care	No need for community care	No institutional care is required	No need mutual pension	No alternative	General	0-999	general	oneself	Need these	need these	need these	need these	need these	need these	need these	need these	no other options
woman	60-65 years	technical secondary school	Urban residents	Married	Two sons	Self-employed	Urban residents medical treatment	Urban workers or urban and rural residents	≥10000 RMB	General	You can take care of yourself	Moderate pain	Energy is ok	Sometimes appear	rarely	rarely	rarely	Sometimes appear	Heard about it but didn't understand it	Community care	agree	Couldn't agree more	Couldn't agree more	agree	Requires home care	Community care is needed	Institutional care is required	No need mutual pension	No alternative	supportive	3000-3999	Very willing to	children	You don't need these	need these	You don't need these	You don't need these	need these	You don't need these	need these	You don't need these	no other options
man	71-75 years	high school	Urban residents	Married	A daughter	Enterprise employees	Town worker medical insurance	Urban workers or urban and rural residents	≥10000 RMB	Healthy	In most cases, you can do it yourself	A little bit sore	Better energy	rarely	rarely	rarely	rarely	rarely	Know	Institutional care	Couldn't agree more	Couldn't agree more	agree	agree	No need for home care	Community care is needed	Institutional care is required	No need mutual pension	No alternative	supportive	3000-3999	Willing to	Other family members	Need these	need these	You don't need these	You don't need these	need these	need these	need these	You don't need these	no other options
man	71-75 years	Junior high school	Urban residents	Married	A daughter	Enterprise employees	Urban residents medical treatment	Urban workers or urban and rural residents	≥10000 RMB	General	In most cases, you can do it yourself	Moderate pain	Energy is ok	rarely	rarely	Sometimes appear	Sometimes appear	rarely	Heard about it but didn't understand it	Home care					Requires home care	No need for community care	No institutional care is required	Need mutual pension	No alternative	General	1000-1999	Very willing to	oneself	You don't need these	need these	You don't need these	You don't need these	need these	need these	need these	You don't need these	no other options
man	71-75 years	Primary school	Urban residents	Married	A son and a daughter	Self-employed	Commercial insurance	Business	6000-9999 RMB	Healthy	In most cases, you can do it yourself	A little bit sore	Energy is ok	often appear	often appear	often appear	often appear	often appear	Know	Home care					Requires home care	Community care is needed	Institutional care is required	Need mutual pension	No alternative	Excellent supportive	1000-1999	Willing to	oneself	Need these	need these	need these	need these	need these	You don't need these	You don't need these	You don't need these	no other options
woman	66-70 years	Primary school	Rural farmers	Married	Two sons	Farmers	New rural cooperative	Land expropriated farmers business	6000-9999 RMB	Healthy	You can take care of yourself	No pain at all	Better energy	rarely	rarely	rarely	rarely	Never appear	Know	Home care					Requires home care	Community care is needed	Institutional care is required	Need mutual pension	No alternative	supportive	1000-1999	Willing to	oneself	Need these	need these	need these	You don't need these	need these	You don't need these	You don't need these	You don't need these	no other options
woman	60-65 years	Junior high school	Urban residents	Married	Two sons	Self-employed	Urban residents medical treatment	Urban workers or urban and rural residents	6000-9999 RMB000-5999 RMB	Healthy	In most cases, you can do it yourself	A little bit sore	Energy is ok	Sometimes appear	rarely	Sometimes appear	often appear	often appear	Heard about it but didn't understand it	Home care					No need for home care	No need for community care	Institutional care is required	No need mutual pension	No alternative	supportive	1000-1999	Very willing to	oneself	Need these	need these	You don't need these	need these	need these	need these	need these	You don't need these	no other options
woman	76-80 years	Junior high school	Urban residents	Widowed	Two sons	Migrant workers	New rural cooperative	None	6000-9999 RMB000-5999 RMB	Healthy	In most cases, you can do it yourself	A little bit sore	Better energy	rarely	Never appear	rarely	rarely	rarely	Know	Institutional care	Couldn't agree more	Couldn't agree more	Partial disagree	Strongly disagree	Requires home care	No need for community care	No institutional care is required	No need mutual pension	No alternative	Excellent supportive	3000-3999	Very willing to	children	Need these	need these	You don't need these	You don't need these	You don't need these	You don't need these	You don't need these	You don't need these	no other options
man	71-75 years	Primary school the following	Rural farmers	Divorced	A son	Farmers	New rural cooperative	Land expropriated farmers business	6000-9999 RMB000-5999 RMB	Bad	Totally in need of care	Severe pain	There is no energy	Always appear	Sometimes appear	Always appear	Sometimes appear	Always appear	Know	Institutional care	Couldn't agree more	general	Partial disagree	Couldn't agree more	Requires home care	Community care is needed	No institutional care is required	No need mutual pension	No alternative	Excellent supportive	2000-2999	Very willing to	oneself	You don't need these	You don't need these	You don't need these	need these	You don't need these	You don't need these	You don't need these	You don't need these	other options
woman	>80 years	Primary school the following	Rural farmers	Divorced	Two daughters	Migrant workers	New rural cooperative	Urban workers or urban and rural residents	6000-9999 RMB	General	Need someone to take care of	Severe pain	Low energy	Always appear	often appear	Always appear	Sometimes appear	Always appear	Never heard	Home care					No need for home care	No need for community care	Institutional care is required	No need mutual pension	Other options	Excellent supportive	2000-2999	Very willing to	children	You don't need these	need these	You don't need these	need these	You don't need these	You don't need these	You don't need these	You don't need these	no other options
woman	60-65 years	Primary school the following	Rural farmers	Widowed	Two sons	Farmers	Commercial insurance	Agency institution	6000-9999 RMB	General	In most cases, you can do it yourself	Moderate pain	Energy is ok	often appear	Sometimes appear	rarely	rarely	rarely	Know	Community care	Couldn't agree more	agree	agree	agree	No need for home care	Community care is needed	No institutional care is required	No need mutual pension	No alternative	General	1000-1999	Willing to	oneself	You don't need these	need these	You don't need these	You don't need these	You don't need these	You don't need these	You don't need these	You don't need these	no other options
man	71-75 years	technical secondary school	Urban residents	Single	Two sons	Migrant workers	New rural cooperative	Agency institution	≥10000 RMB	Excellent	You can take care of yourself	A little bit sore	Full of energy	Never appear	Never appear	Never appear	Never appear	Never appear	Know	Home care					No need for home care	Community care is needed	Institutional care is required	No need mutual pension	No alternative	General	3000-3999	Very willing to	children	Need these	need these	need these	need these	need these	need these	need these	need these	no other options
man	60-65 years	technical secondary school	Rural farmers	Divorced	A son and a daughter	Enterprise employees	Town worker medical insurance	Urban workers or urban and rural residents	6000-9999 RMB000-5999 RMB	Healthy	In most cases, you can do it yourself	A little bit sore	Energy is ok	Sometimes appear	Never appear	rarely	rarely	Never appear	Know	Institutional care	agree	Couldn't agree more	agree	general	Requires home care	Community care is needed	No institutional care is required	No need mutual pension	No alternative	supportive	1000-1999	general	oneself	You don't need these	You don't need these	You don't need these	need these	need these	need these	You don't need these	You don't need these	no other options
woman	71-75 years	bachelor degree or above	Urban residents	Married	A son and a daughter	Institutions	Town worker medical insurance	Urban workers or urban and rural residents	≥10000 RMB	Healthy	In most cases, you can do it yourself	A little bit sore	Energy is ok	rarely	Never appear	rarely	rarely	rarely	Know	Home care					Requires home care	Community care is needed	Institutional care is required	Need mutual pension	No alternative	Excellent supportive	2000-2999	Willing to	children	Need these	need these	need these	need these	need these	You don't need these	You don't need these	You don't need these	no other options
woman	71-75 years	Primary school	Urban residents	Married	Two daughters	Self-employed	Commercial insurance	Business	6000-9999 RMB000-5999 RMB	Excellent	In most cases, you can do it yourself	A little bit sore	Better energy	Sometimes appear	Sometimes appear	Sometimes appear	Sometimes appear	Sometimes appear	Know	Home care					Requires home care	Community care is needed	Institutional care is required	Need mutual pension	No alternative	Excellent supportive	1000-1999	Willing to	oneself	Need these	You don't need these	need these	need these	need these	You don't need these	need these	You don't need these	no other options
man	66-70 years	Junior high school	Urban residents	Married	A son and a daughter	Institutions	Urban residents medical treatment	Urban workers or urban and rural residents	6000-9999 RMB	Healthy	You can take care of yourself	No pain at all	Full of energy	rarely	rarely	Never appear	Never appear	Never appear	Know very well	Home care					Requires home care	Community care is needed	Institutional care is required	Need mutual pension	No alternative	Excellent supportive	1000-1999	Willing to	spouse	Need these	need these	need these	need these	You don't need these	You don't need these	You don't need these	You don't need these	no other options
man	60-65 years	Primary school	Urban residents	Married	A son and a daughter	Enterprise employees	Urban residents medical treatment	Urban workers or urban and rural residents	6000-9999 RMB	Healthy	You can take care of yourself	A little bit sore	Better energy	rarely	Never appear	Never appear	Sometimes appear	rarely	Heard about it but didn't understand it	Home care					Requires home care	No need for community care	No institutional care is required	No need mutual pension	No alternative	General	1000-1999	Willing to	children	You don't need these	You don't need these	You don't need these	#REF!	need these	You don't need these	need these	need these	no other options
man	71-75 years	high school	Urban residents	Single	A daughter	Civil servants	Commercial insurance	Agency institution	6000-9999 RMB	Healthy	Totally in need of care	No pain at all	Better energy	rarely	Never appear	Never appear	Never appear	Never appear	Know very well	Home care					No need for home care	Community care is needed	Institutional care is required	No need mutual pension	No alternative	General	3000-3999	general	children	Need these	need these	need these	need these	need these	You don't need these	You don't need these	You don't need these	no other options
woman	66-70 years	Junior high school	Urban residents	Married	A daughter	Institutions	None	Urban workers or urban and rural residents	6000-9999 RMB000-5999 RMB	Excellent	In most cases, you can do it yourself	A little bit sore	Better energy	rarely	rarely	rarely	Never appear	Sometimes appear	Heard about it but didn't understand it	Community care	agree	agree	Couldn't agree more	agree	Requires home care	No need for community care	No institutional care is required	No need mutual pension	No alternative	supportive	1000-1999	Willing to	Other family members	You don't need these	need these	You don't need these	You don't need these	#REF!	You don't need these	need these	need these	no other options
man	71-75 years	Primary school	Urban residents	Married	A son and a daughter	Institutions	Commercial insurance	Urban workers or urban and rural residents	6000-9999 RMB000-5999 RMB	General	In most cases, you can do it yourself	A little bit sore	Better energy	often appear	Sometimes appear	often appear	Sometimes appear	rarely	Know	Community care	general	general	agree	agree	No need for home care	No need for community care	Institutional care is required	No need mutual pension	No alternative	supportive	0-999	Willing to	children	Need these	need these	need these	need these	need these	need these	need these	You don't need these	no other options
woman	>80 years	Primary school the following	Rural farmers	Married	8	Farmers	New rural cooperative	Business	<6000-9999 RMB000 RMB	Bad	Need someone to take care of	Severe pain	Low energy	Always appear	Always appear	Always appear	often appear	often appear	Heard about it but didn't understand it	Mutual endowment	agree	agree	agree	general	Requires home care	No need for community care	No institutional care is required	No need mutual pension	No alternative	supportive	0-999	Very willing to	oneself	Need these	You don't need these	need these	need these	need these	You don't need these	need these	You don't need these	no other options
woman	66-70 years	Junior high school	Urban residents	Widowed	Two sons	Migrant workers	Town worker medical insurance	Urban workers or urban and rural residents	6000-9999 RMB000-5999 RMB	Healthy	In most cases, you can do it yourself	A little bit sore	Energy is ok	Sometimes appear	rarely	Sometimes appear	often appear	often appear	Know	Home care					No need for home care	No need for community care	Institutional care is required	No need mutual pension	No alternative	General	2000-2999	general	friend	Need these	You don't need these	You don't need these	need these	You don't need these	You don't need these	need these	need these	no other options
man	71-75 years	Junior high school	Rural farmers	Divorced	others	Enterprise employees	Commercial insurance	Agency institution	≥10000 RMB	Bad	In most cases, you can do it yourself	Moderate pain	There is no energy	often appear	often appear	often appear	Always appear	Always appear	Know	Institutional care	Couldn't agree more	agree	agree	general	No need for home care	Community care is needed	No institutional care is required	No need mutual pension	No alternative	General	3000-3999	Very willing to	Other family members	Need these	You don't need these	need these	You don't need these	need these	You don't need these	need these	You don't need these	no other options
woman	66-70 years	technical secondary school	Urban residents	Married	Two sons	Institutions	Commercial insurance	Urban workers or urban and rural residents	6000-9999 RMB000-5999 RMB	General	In most cases, you can do it yourself	A little bit sore	Low energy	often appear	Always appear	Sometimes appear	often appear	often appear	Know	Community care	agree	agree	Couldn't agree more	Couldn't agree more	No need for home care	No need for community care	Institutional care is required	No need mutual pension	No alternative	supportive	1000-1999	Willing to	oneself	You don't need these	need these	You don't need these	You don't need these	need these	You don't need these	You don't need these	need these	no other options
man	66-70 years	Primary school the following	Rural farmers	Widowed	Two sons	Institutions	endowment insurance、Medical insurance	Agency institution	6000-9999 RMB000-5999 RMB	Healthy	In most cases, you can do it yourself	Severe pain	Better energy	Always appear	often appear	Always appear	Always appear	often appear	Know	Institutional care	agree	general	general	general	Requires home care	No need for community care	No institutional care is required	No need mutual pension	No alternative	General	1000-1999	Willing to	oneself	Need these	need these	You don't need these	need these	You don't need these	You don't need these	need these	need these	no other options
woman	60-65 years	technical secondary school	Urban residents	Married	Two sons	Institutions	endowment insurance、Medical insurance	Urban workers or urban and rural residents	6000-9999 RMB	Healthy	In most cases, you can do it yourself	No pain at all	Better energy	Never appear	rarely	Never appear	Never appear	rarely	Know	Home care					No need for home care	Community care is needed	Institutional care is required	No need mutual pension	No alternative	supportive	0-999	Willing to	oneself	Need these	You don't need these	need these	You don't need these	need these	You don't need these	You don't need these	You don't need these	no other options
man	66-70 years	Primary school	Rural farmers	Divorced	A daughter	Self-employed	Urban residents medical treatment	Land expropriated farmers business	6000-9999 RMB	General	In most cases, you can do it yourself	No pain at all	Energy is ok	often appear	often appear	often appear	Sometimes appear	rarely	Know	Home care					No need for home care	Community care is needed	Institutional care is required	Need mutual pension	No alternative	supportive	1000-1999	Willing to	children	You don't need these	need these	need these	need these	need these	need these	need these	need these	no other options
woman	71-75 years	Primary school	Rural farmers	Married	Two sons	Migrant workers	New rural cooperative	Urban workers or urban and rural residents	6000-9999 RMB	General	In most cases, you can do it yourself	A little bit sore	Energy is ok	Never appear	Never appear	Never appear	Never appear	Never appear	Know	Home care					No need for home care	Community care is needed	No institutional care is required	No need mutual pension	No alternative	supportive	3000-3999	Willing to	oneself	Need these	need these	You don't need these	need these	You don't need these	need these	You don't need these	You don't need these	no other options
man	76-80 years	Primary school	Rural farmers	Married	Two daughters	Farmers	New rural cooperative	Urban workers or urban and rural residents	6000-9999 RMB	Excellent	You can take care of yourself	A little bit sore	Better energy	Sometimes appear	rarely	often appear	Sometimes appear	often appear	Never heard	Institutional care	general	general	general	Couldn't agree more	Requires home care	Community care is needed	No institutional care is required	No need mutual pension	No alternative	General	≥4000	general	spouse	Need these	You don't need these	You don't need these	You don't need these	need these	You don't need these	need these	You don't need these	no other options
man	71-75 years	Junior high school	Rural farmers	Divorced	Two sons	Farmers	New rural cooperative	Urban workers or urban and rural residents	6000-9999 RMB	Healthy	In most cases, you can do it yourself	A little bit sore	Better energy	Sometimes appear	rarely	Never appear	rarely	rarely	Know	Home care					Requires home care	Community care is needed	Institutional care is required	No need mutual pension	No alternative	General	2000-2999	Willing to	oneself	You don't need these	You don't need these	You don't need these	You don't need these	need these	need these	need these	You don't need these	no other options
woman	76-80 years	Primary school the following	Rural farmers	Married	Two sons	Farmers	New rural cooperative	Urban workers or urban and rural residents	6000-9999 RMB	Healthy	In most cases, you can do it yourself	A little bit sore	Better energy	Never appear	Never appear	Never appear	Never appear	Never appear	Know	Home care					Requires home care	No need for community care	No institutional care is required	Need mutual pension	No alternative	General	0-999	Willing to	oneself	You don't need these	You don't need these	You don't need these	You don't need these	need these	need these	need these	You don't need these	no other options
man	60-65 years	Primary school	Rural farmers	Married	Two daughters	Farmers	endowment insurance、Medical insurance	Urban workers or urban and rural residents	≥10000 RMB	Healthy	In most cases, you can do it yourself	A little bit sore	Better energy	rarely	rarely	rarely	rarely	rarely	Heard about it but didn't understand it	Home care					Requires home care	No need for community care	No institutional care is required	Need mutual pension	No alternative	General	0-999	Willing to	oneself	You don't need these	You don't need these	You don't need these	need these	need these	You don't need these	need these	need these	no other options
man	66-70 years	Primary school	Urban residents	Married	A son and a daughter	Self-employed	Urban residents medical treatment	Urban workers or urban and rural residents	6000-9999 RMB	Healthy	You can take care of yourself	A little bit sore	Better energy	Sometimes appear	Sometimes appear	Sometimes appear	Sometimes appear	Sometimes appear	Know	Home care					Requires home care	Community care is needed	Institutional care is required	Need mutual pension	No alternative	supportive	1000-1999	Very willing to	oneself	Need these	You don't need these	You don't need these	You don't need these	need these	need these	You don't need these	need these	no other options
man	71-75 years	high school	Urban residents	Married	A daughter	Civil servants	Commercial insurance	Agency institution	6000-9999 RMB	Healthy	In most cases, you can do it yourself	No pain at all	Full of energy	Sometimes appear	Sometimes appear	rarely	rarely	rarely	Know	Home care					Requires home care	Community care is needed	Institutional care is required	Need mutual pension	No alternative	Excellent supportive	1000-1999	Willing to	oneself	Need these	need these	need these	need these	need these	need these	need these	need these	no other options
woman	60-65 years	bachelor degree or above	Urban residents	Married	A daughter	Civil servants	Urban residents medical treatment	Agency institution	≥10000 RMB	Excellent	You can take care of yourself	A little bit sore	Full of energy	Never appear	Never appear	Never appear	Never appear	Never appear	Know very well	Home care					No need for home care	Community care is needed	Institutional care is required	No need mutual pension	No alternative	Excellent supportive	≥4000	Very willing to	oneself	Need these	need these	You don't need these	need these	You don't need these	You don't need these	You don't need these	need these	no other options
woman	60-65 years	Junior high school	Rural farmers	Married	Two sons	Self-employed	Commercial insurance	None	6000-9999 RMB000-5999 RMB	General	In most cases, you can do it yourself	A little bit sore	Energy is ok	rarely	Never appear	Sometimes appear	rarely	rarely	Never heard	Other	agree	agree	agree	Couldn't agree more	No need for home care	No need for community care	Institutional care is required	No need mutual pension	No alternative	General	0-999	Willing to	children	Need these	You don't need these	You don't need these	You don't need these	need these	You don't need these	You don't need these	You don't need these	no other options
man	66-70 years	Junior high school	Urban residents	Single	Two sons	Enterprise employees	Commercial insurance	Agency institution	6000-9999 RMB	General	In most cases, you can do it yourself	A little bit sore	Energy is ok	often appear	Sometimes appear	often appear	often appear	Always appear	Know very well	Community care	Couldn't agree more	general	agree	general	Requires home care	No need for community care	Institutional care is required	Need mutual pension	Other options	General	2000-2999	Willing to	oneself	You don't need these	You don't need these	need these	You don't need these	You don't need these	need these	You don't need these	You don't need these	no other options
woman	66-70 years	Junior high school	Rural farmers	Married	Two daughters	Migrant workers	Commercial insurance	Urban workers or urban and rural residents	6000-9999 RMB000-5999 RMB	Healthy	In most cases, you can do it yourself	A little bit sore	Better energy	Always appear	often appear	often appear	Always appear	often appear	Know	Community care	agree	agree	general	Partial disagree	Requires home care	No need for community care	Institutional care is required	No need mutual pension	No alternative	supportive	2000-2999	general	Other family members	You don't need these	need these	need these	You don't need these	You don't need these	You don't need these	You don't need these	You don't need these	no other options
man	76-80 years	Primary school	Rural farmers	Married	A daughter	Farmers	None	None	6000-9999 RMB	Healthy	You can take care of yourself	A little bit sore	Better energy	Never appear	Never appear	Never appear	rarely	Never appear	Never heard	Home care					Requires home care	Community care is needed	No institutional care is required	No need mutual pension	No alternative	supportive	0-999	Willing to	children	You don't need these	need these	You don't need these	You don't need these	need these	You don't need these	need these	You don't need these	no other options
woman	60-65 years	high school	Urban residents	Married	Two sons	Institutions	Commercial insurance	Agency institution	6000-9999 RMB	Excellent	You can take care of yourself	No pain at all	Full of energy	rarely	Never appear	Never appear	Never appear	Sometimes appear	Know	Home care					Requires home care	Community care is needed	Institutional care is required	No need mutual pension	No alternative	supportive	2000-2999	Willing to	Other family members	You don't need these	need these	You don't need these	You don't need these	need these	You don't need these	need these	need these	no other options
man	>80 years	Primary school the following	Rural farmers	Married	A son	Farmers	None	None	6000-9999 RMB000-5999 RMB	General	In most cases, you can do it yourself	A little bit sore	Energy is ok	Sometimes appear	rarely	often appear	often appear	rarely	Never heard	Home care					No need for home care	Community care is needed	Institutional care is required	No need mutual pension	No alternative	supportive	0-999	general	Other family members	You don't need these	need these	need these	need these	need these	need these	need these	need these	no other options
man	71-75 years	Junior high school	Urban residents	Married	A son	Self-employed	Urban residents medical treatment	Business	6000-9999 RMB	Healthy	In most cases, you can do it yourself	A little bit sore	Energy is ok	rarely	Never appear	rarely	rarely	Never appear	Know	Home care					Requires home care	Community care is needed	Institutional care is required	Need mutual pension	No alternative	Excellent supportive	1000-1999	Willing to	children	You don't need these	need these	need these	need these	You don't need these	need these	need these	You don't need these	no other options
woman	66-70 years	Primary school	Rural farmers	Divorced	A daughter	Farmers	New rural cooperative	Urban workers or urban and rural residents	6000-9999 RMB000-5999 RMB	Healthy	In most cases, you can do it yourself	Moderate pain	Better energy	Never appear	Never appear	Never appear	rarely	Never appear	Know	Home care					Requires home care	Community care is needed	No institutional care is required	No need mutual pension	No alternative	General	0-999	general	children	You don't need these	You don't need these	You don't need these	need these	need these	You don't need these	need these	You don't need these	no other options
woman	66-70 years	Primary school the following	Rural farmers	Married	Two sons	Self-employed	Commercial insurance	Business	6000-9999 RMB	General	In most cases, you can do it yourself	Moderate pain	Energy is ok	often appear	rarely	often appear	often appear	Never appear	Know	Home care					Requires home care	Community care is needed	Institutional care is required	Need mutual pension	No alternative	Excellent supportive	1000-1999	Very willing to	oneself	You don't need these	need these	need these	need these	You don't need these	You don't need these	You don't need these	need these	no other options
woman	>80 years	Primary school the following	Urban residents	Married	A son and a daughter	Others	Urban residents medical treatment	Business	6000-9999 RMB	Excellent	In most cases, you can do it yourself	No pain at all	Better energy	rarely	rarely	rarely	Never appear	Never appear	Heard about it but didn't understand it	Community care	agree	agree	agree	general	Requires home care	No need for community care	No institutional care is required	Need mutual pension	No alternative	supportive	1000-1999	Willing to	Other family members	You don't need these	need these	You don't need these	You don't need these	need these	You don't need these	need these	You don't need these	other options
man	76-80 years	Junior high school	Urban residents	Married	A daughter	Enterprise employees	endowment insurance、Medical insurance	Business	≥10000 RMB	Excellent	In most cases, you can do it yourself	A little bit sore	Full of energy	Never appear	Never appear	Never appear	rarely	rarely	Know	Institutional care	agree	general	agree	general	Requires home care	Community care is needed	No institutional care is required	9	9	Excellent supportive	2000-2999	Willing to	Other family members	You don't need these	need these	You don't need these	need these	need these	You don't need these	need these	You don't need these	no other options
man	>80 years	Primary school the following	Rural farmers	Divorced	Two daughters	Farmers	New rural cooperative	None	6000-9999 RMB000-5999 RMB	Healthy	In most cases, you can do it yourself	No pain at all	Better energy	Sometimes appear	Never appear	rarely	Never appear	Never appear	Never heard	Home care					Requires home care	Community care is needed	No institutional care is required	No need mutual pension	No alternative	supportive	0-999	general	oneself	You don't need these	need these	You don't need these	need these	need these	You don't need these	You don't need these	You don't need these	no other options
man	60-65 years	bachelor degree or above	Urban residents	Married	Two daughters	Institutions	Town worker medical insurance	Business	≥10000 RMB	Excellent	You can take care of yourself	No pain at all	Better energy	Never appear	Never appear	Never appear	Never appear	rarely	Know	Home care					Requires home care	Community care is needed	No institutional care is required	Need mutual pension	No alternative	Excellent supportive	2000-2999	Very willing to	oneself	Need these	need these	You don't need these	need these	need these	You don't need these	need these	You don't need these	no other options
man	60-65 years	junior college	Urban residents	Married	A daughter	Enterprise employees	Town worker medical insurance	Urban workers or urban and rural residents	6000-9999 RMB000-5999 RMB	Bad	Need someone to take care of	A little bit sore	Low energy	Sometimes appear	Sometimes appear	rarely	Sometimes appear	Sometimes appear	Heard about it but didn't understand it	Home care					Requires home care	Community care is needed	No institutional care is required	No need mutual pension	No alternative	supportive	1000-1999	general	professionals	Need these	need these	need these	need these	You don't need these	need these	You don't need these	You don't need these	no other options
woman	76-80 years	high school	Urban residents	Divorced	A daughter	Institutions	Town worker medical insurance	Agency institution	6000-9999 RMB	General	You can take care of yourself	A little bit sore	Energy is ok	Never appear	Never appear	Never appear	Never appear	Never appear	Heard about it but didn't understand it	Home care					Requires home care	No need for community care	No institutional care is required	Need mutual pension	No alternative	supportive	2000-2999	Willing to	oneself	You don't need these	need these	You don't need these	You don't need these	You don't need these	need these	need these	You don't need these	no other options
woman	76-80 years	junior college	Urban residents	Married	Two daughters	Institutions	Urban residents medical treatment	None	6000-9999 RMB000-5999 RMB	General	In most cases, you can do it yourself	No pain at all	Energy is ok	rarely	Sometimes appear	rarely	Sometimes appear	Sometimes appear	Never heard	Home care					Requires home care	Community care is needed	No institutional care is required	No need mutual pension	No alternative	supportive	1000-1999	general	spouse	Need these	need these	need these	need these	need these	need these	You don't need these	You don't need these	no other options
woman	76-80 years	junior college	Urban residents	Married	A daughter	Institutions	Town worker medical insurance	Agency institution	≥10000 RMB	Healthy	You can take care of yourself	No pain at all	Full of energy	Never appear	Never appear	Never appear	Never appear	Never appear	Know	Institutional care	general	general	agree	agree	No need for home care	Community care is needed	Institutional care is required	Need mutual pension	No alternative	supportive	1000-1999	Willing to	oneself	You don't need these	need these	need these	You don't need these	You don't need these	need these	You don't need these	You don't need these	no other options
man	71-75 years	junior college	Urban residents	Married	A daughter	Institutions	None	Agency institution	6000-9999 RMB	Bad	You can take care of yourself	A little bit sore	Better energy	Never appear	Never appear	Never appear	Never appear	Never appear	Know	Other	general	agree	general	agree	No need for home care	Community care is needed	No institutional care is required	No need mutual pension	No alternative	General	2000-2999	Willing to	oneself	Need these	You don't need these	You don't need these	You don't need these	need these	You don't need these	You don't need these	You don't need these	no other options
woman	71-75 years	junior college	Urban residents	Married	A daughter	Institutions	Town worker medical insurance	Urban workers or urban and rural residents	6000-9999 RMB	General	You can take care of yourself	No pain at all	Better energy	Never appear	Never appear	Never appear	Never appear	Never appear	Know	Home care					No need for home care	Community care is needed	No institutional care is required	No need mutual pension	No alternative	supportive	2000-2999	Willing to	oneself	You don't need these	You don't need these	You don't need these	need these	need these	You don't need these	You don't need these	You don't need these	no other options
man	>80 years	high school	Urban residents	Married	Two daughters	Civil servants	Town worker medical insurance	Urban workers or urban and rural residents	6000-9999 RMB	General	You can take care of yourself	No pain at all	Energy is ok	rarely	rarely	rarely	rarely	rarely	Know very well	Home care					Requires home care	No need for community care	No institutional care is required	No need mutual pension	No alternative	supportive	3000-3999	Willing to	friend	You don't need these	You don't need these	need these	need these	You don't need these	need these	You don't need these	You don't need these	no other options
woman	76-80 years	Junior high school	Urban residents	Married	A daughter	Enterprise employees	Town worker medical insurance	Urban workers or urban and rural residents	6000-9999 RMB000-5999 RMB	Healthy	You can take care of yourself	No pain at all	Better energy	Never appear	Never appear	Never appear	Never appear	Never appear	Know	Home care					Requires home care	Community care is needed	No institutional care is required	Need mutual pension	No alternative	Excellent supportive	1000-1999	Very willing to	spouse	You don't need these	need these	need these	need these	need these	need these	need these	You don't need these	no other options
man	76-80 years	junior college	Urban residents	Married	A daughter	Enterprise employees	Town worker medical insurance	Urban workers or urban and rural residents	6000-9999 RMB	General	In most cases, you can do it yourself	A little bit sore	Energy is ok	Sometimes appear	Sometimes appear	Sometimes appear	Sometimes appear	Sometimes appear	Know	Other	agree	Couldn't agree more	Couldn't agree more	Couldn't agree more	Requires home care	No need for community care	No institutional care is required	No need mutual pension	No alternative	supportive	1000-1999	Willing to	oneself	You don't need these	You don't need these	need these	need these	need these	need these	You don't need these	You don't need these	no other options
woman	76-80 years	high school	Urban residents	Married	A son	Enterprise employees	Town worker medical insurance	Urban workers or urban and rural residents	≥10000 RMB	General	In most cases, you can do it yourself	A little bit sore	Energy is ok	Sometimes appear	Never appear	Never appear	Never appear	Sometimes appear	Heard about it but didn't understand it	Home care					Requires home care	No need for community care	No institutional care is required	No need mutual pension	No alternative	General	0-999	general	professionals	Need these	need these	You don't need these	need these	You don't need these	need these	You don't need these	You don't need these	no other options
woman	76-80 years	Primary school the following	Urban residents	Married	A son	Enterprise employees	Town worker medical insurance	Urban workers or urban and rural residents	6000-9999 RMB	General	You can take care of yourself	A little bit sore	Energy is ok	Never appear	Never appear	Never appear	Never appear	Never appear	Heard about it but didn't understand it	Home care					Requires home care	No need for community care	No institutional care is required	No need mutual pension	No alternative	General	1000-1999	Reluctant to	oneself	You don't need these	You don't need these	You don't need these	You don't need these	need these	You don't need these	You don't need these	You don't need these	no other options
man	71-75 years	junior college	Urban residents	Married	A son	Others	Urban residents medical treatment	Urban workers or urban and rural residents	6000-9999 RMB000-5999 RMB	General	You can take care of yourself	A little bit sore	Better energy	Sometimes appear	rarely	rarely	rarely	Sometimes appear	Heard about it but didn't understand it	Home care					Requires home care	No need for community care	No institutional care is required	Need mutual pension	No alternative	General	≥4000	general	oneself	Need these	You don't need these	You don't need these	You don't need these	You don't need these	You don't need these	You don't need these	You don't need these	no other options
man	66-70 years	Junior high school	Urban residents	Married	A son	Institutions	Town worker medical insurance	Agency institution	≥10000 RMB	General	You can take care of yourself	No pain at all	Full of energy	rarely	rarely	rarely	rarely	rarely	Never heard	Home care					Requires home care	No need for community care	No institutional care is required	No need mutual pension	No alternative	Don't support	0-999	Very reluctant	Other family members	You don't need these	You don't need these	You don't need these	need these	need these	need these	need these	You don't need these	no other options
man	60-65 years	junior college	Urban residents	Married	A son	Enterprise employees	endowment insurance、Medical insurance	Urban workers or urban and rural residents	≥10000 RMB	General	You can take care of yourself	A little bit sore	Full of energy	rarely	rarely	rarely	rarely	rarely	Know very well	Community care	Couldn't agree more	Couldn't agree more	Couldn't agree more	Couldn't agree more	No need for home care	No need for community care	Institutional care is required	No need mutual pension	No alternative	Excellent supportive	2000-2999	Very willing to	spouse	You don't need these	You don't need these	You don't need these	You don't need these	You don't need these	You don't need these	need these	You don't need these	no other options
man	76-80 years	junior college	Urban residents	Married	A daughter	Institutions	Town worker medical insurance	Agency institution	≥10000 RMB	General	You can take care of yourself	No pain at all	Better energy	Sometimes appear	Never appear	Never appear	Sometimes appear	Sometimes appear	Know	Home care					Requires home care	No need for community care	Institutional care is required	No need mutual pension	No alternative	General	3000-3999	general	oneself	Need these	You don't need these	need these	You don't need these	need these	You don't need these	You don't need these	You don't need these	no other options
woman	76-80 years	Junior high school	Urban residents	Married	A daughter	Enterprise employees	Town worker medical insurance	Urban workers or urban and rural residents	≥10000 RMB	Bad	Need someone to take care of	Moderate pain	Full of energy	Never appear	Never appear	Never appear	Never appear	Never appear	Heard about it but didn't understand it	Home care					Requires home care	No need for community care	No institutional care is required	No need mutual pension	No alternative	General	3000-3999	general	oneself	Need these	You don't need these	need these	need these	need these	You don't need these	You don't need these	You don't need these	no other options
man	>80 years	junior college	Urban residents	Married	A daughter	Enterprise employees	Town worker medical insurance	Urban workers or urban and rural residents	6000-9999 RMB	Healthy	In most cases, you can do it yourself	No pain at all	Energy is ok	Never appear	Never appear	Never appear	Never appear	Never appear	Know very well	Community care	agree	agree	agree	agree	No need for home care	No need for community care	Institutional care is required	No need mutual pension	No alternative	Excellent supportive	0-999	Willing to	oneself	Need these	need these	You don't need these	need these	need these	need these	need these	need these	no other options
woman	71-75 years	Primary school	Rural farmers	Married	Two sons	Farmers	New rural cooperative	Land expropriated farmers business	6000-9999 RMB	Healthy	You can take care of yourself	A little bit sore	Full of energy	rarely	rarely	Sometimes appear	Sometimes appear	rarely	Never heard	Home care					Requires home care	No need for community care	No institutional care is required	No need mutual pension	No alternative	supportive	0-999	Very willing to	children	Need these	You don't need these	need these	You don't need these	You don't need these	You don't need these	You don't need these	You don't need these	other options
woman	76-80 years	high school	Urban residents	Married	Two sons	Institutions	Town worker medical insurance	Agency institution	6000-9999 RMB	Healthy	You can take care of yourself	A little bit sore	Better energy	Never appear	Never appear	Never appear	Never appear	rarely	Know	Home care					No need for home care	No need for community care	Institutional care is required	Need mutual pension	No alternative	0	1000-1999	Willing to	oneself	Need these	You don't need these	need these	You don't need these	need these	You don't need these	You don't need these	need these	no other options
woman	60-65 years	technical secondary school	Urban residents	Married	A son	Institutions	Urban residents medical treatment	Agency institution	6000-9999 RMB	Healthy	You can take care of yourself	No pain at all	Full of energy	rarely	rarely	rarely	rarely	rarely	Heard about it but didn't understand it	Home care					Requires home care	No need for community care	No institutional care is required	No need mutual pension	No alternative	General	2000-2999	general	professionals	You don't need these	You don't need these	need these	need these	need these	need these	You don't need these	You don't need these	no other options
woman	66-70 years	Junior high school	Urban residents	Married	A son	Enterprise employees	Town worker medical insurance	Urban workers or urban and rural residents	≥10000 RMB	Healthy	You can take care of yourself	No pain at all	Full of energy	Sometimes appear	rarely	Never appear	rarely	rarely	Never heard	Home care					No need for home care	No need for community care	No institutional care is required	Need mutual pension	No alternative	supportive	2000-2999	Willing to	children	You don't need these	You don't need these	need these	You don't need these	need these	You don't need these	You don't need these	You don't need these	no other options
woman	60-65 years	junior college	Urban residents	Married	A son	Institutions	Town worker medical insurance	Agency institution	6000-9999 RMB	General	You can take care of yourself	A little bit sore	Energy is ok	rarely	rarely	Never appear	Never appear	rarely	Know	Home care					No need for home care	No need for community care	No institutional care is required	Need mutual pension	No alternative	supportive	1000-1999	Willing to	oneself	Need these	need these	need these	need these	need these	need these	need these	You don't need these	no other options
man	>80 years	junior college	Urban residents	Divorced	A daughter	Institutions	Town worker medical insurance	Urban workers or urban and rural residents	≥10000 RMB	General	Need someone to take care of	No pain at all	Low energy	rarely	rarely	rarely	Sometimes appear	Sometimes appear	Never heard	Other	agree	agree	Couldn't agree more	Couldn't agree more	Requires home care	No need for community care	No institutional care is required	No need mutual pension	No alternative	General	0-999	general	oneself	Need these	You don't need these	You don't need these	You don't need these	You don't need these	You don't need these	You don't need these	You don't need these	other options
man	>80 years	Junior high school	Urban residents	Married	Two sons	Civil servants	Town worker medical insurance	Agency institution	6000-9999 RMB	Healthy	You can take care of yourself	No pain at all	Better energy	often appear	often appear	often appear	Sometimes appear	Sometimes appear	Never heard	Home care					No need for home care	No need for community care	No institutional care is required	Need mutual pension	No alternative	supportive	1000-1999	Willing to	children	You don't need these	You don't need these	You don't need these	need these	need these	need these	need these	You don't need these	no other options
woman	76-80 years	high school	Urban residents	Married	Two sons	Institutions	Town worker medical insurance	Agency institution	6000-9999 RMB	Healthy	You can take care of yourself	No pain at all	Better energy	Sometimes appear	Sometimes appear	Sometimes appear	Sometimes appear	Sometimes appear	Never heard	Community care	Couldn't agree more	Couldn't agree more	Couldn't agree more	Couldn't agree more	No need for home care	No need for community care	No institutional care is required	Need mutual pension	No alternative	supportive	0-999	Willing to	children	You don't need these	You don't need these	You don't need these	need these	need these	need these	need these	You don't need these	no other options
woman	>80 years	junior college	Urban residents	Married	A daughter	Civil servants	Town worker medical insurance	Agency institution	≥10000 RMB	General	In most cases, you can do it yourself	No pain at all	Better energy	rarely	rarely	rarely	Sometimes appear	Never appear	Heard about it but didn't understand it	Home care					Requires home care	No need for community care	No institutional care is required	No need mutual pension	No alternative	General	2000-2999	Willing to	spouse	Need these	need these	need these	You don't need these	need these	You don't need these	You don't need these	You don't need these	no other options
man	>80 years	high school	Urban residents	Married	A son	Others	Town worker medical insurance	Agency institution	≥10000 RMB	Poor	Need someone to take care of	Moderate pain	Low energy	often appear	Sometimes appear	often appear	Always appear	rarely	Know	Home care					Requires home care	No need for community care	Institutional care is required	No need mutual pension	No alternative	Excellent supportive	1000-1999	Willing to	oneself	Need these	You don't need these	need these	You don't need these	need these	You don't need these	You don't need these	You don't need these	other options
woman	>80 years	Junior high school	Urban residents	Married	Two sons	Civil servants	Town worker medical insurance	Agency institution	≥10000 RMB	General	Need someone to take care of	A little bit sore	Energy is ok	Never appear	Never appear	rarely	Never appear	Never appear	Know very well	Institutional care	Couldn't agree more	Couldn't agree more	Couldn't agree more	Couldn't agree more	Requires home care	No need for community care	No institutional care is required	No need mutual pension	No alternative	Excellent supportive	≥4000	Very willing to	oneself	Need these	You don't need these	You don't need these	need these	You don't need these	You don't need these	need these	You don't need these	other options
woman	76-80 years	junior college	Urban residents	Married	A daughter	Enterprise employees	Town worker medical insurance	Urban workers or urban and rural residents	≥10000 RMB	General	Need someone to take care of	A little bit sore	Energy is ok	rarely	Never appear	rarely	Sometimes appear	Sometimes appear	Know very well	Community care	agree	agree	Couldn't agree more	Couldn't agree more	No need for home care	No need for community care	Institutional care is required	No need mutual pension	No alternative	Excellent supportive	≥4000	Very willing to	oneself	You don't need these	You don't need these	You don't need these	You don't need these	You don't need these	You don't need these	You don't need these	You don't need these	other options
man	>80 years	Primary school the following	Urban residents	Divorced	Two sons	Migrant workers	Town worker medical insurance	Urban workers or urban and rural residents	≥10000 RMB	General	You can take care of yourself	A little bit sore	Energy is ok	rarely	Never appear	Never appear	Never appear	Never appear	Never heard	Home care					Requires home care	No need for community care	No institutional care is required	No need mutual pension	No alternative	supportive	≥4000	Willing to	oneself	Need these	You don't need these	need these	need these	need these	need these	You don't need these	You don't need these	no other options
woman	>80 years	junior college	Urban residents	Divorced	Two sons	Civil servants	Town worker medical insurance	Urban workers or urban and rural residents	6000-9999 RMB000-5999 RMB	General	In most cases, you can do it yourself	A little bit sore	Energy is ok	often appear	often appear	Sometimes appear	rarely	rarely	Know	Community care	agree	general	Couldn't agree more	agree	Requires home care	No need for community care	No institutional care is required	No need mutual pension	No alternative	supportive	1000-1999	Very willing to	children	You don't need these	You don't need these	need these	need these	You don't need these	need these	You don't need these	You don't need these	no other options
woman	>80 years	junior college	Urban residents	Married	Two sons	Institutions	Town worker medical insurance	Agency institution	≥10000 RMB	General	In most cases, you can do it yourself	A little bit sore	Energy is ok	Sometimes appear	Sometimes appear	rarely	rarely	Never appear	Heard about it but didn't understand it	Home care					Requires home care	Community care is needed	No institutional care is required	No need mutual pension	No alternative	Very unsupportive	2000-2999	Willing to	children	Need these	You don't need these	need these	You don't need these	need these	You don't need these	You don't need these	You don't need these	no other options
woman	71-75 years	high school	Urban residents	Married	A son	Institutions	Town worker medical insurance	Agency institution	6000-9999 RMB	General	In most cases, you can do it yourself	A little bit sore	Better energy	Sometimes appear	Sometimes appear	Sometimes appear	rarely	rarely	Heard about it but didn't understand it	Home care					No need for home care	Community care is needed	No institutional care is required	No need mutual pension	No alternative	supportive	≥4000	Willing to	children	You don't need these	You don't need these	You don't need these	need these	You don't need these	need these	need these	You don't need these	no other options
man	60-65 years	Primary school the following	Urban residents	Divorced	0	Farmers	Town worker medical insurance	Urban workers or urban and rural residents	6000-9999 RMB000-5999 RMB	General	Need someone to take care of	Moderate pain	There is no energy	Sometimes appear	Never appear	Never appear	rarely	rarely	Know	Home care					No need for home care	No need for community care	Institutional care is required	No need mutual pension	No alternative	General	1000-1999	Very reluctant	oneself	You don't need these	You don't need these	need these	You don't need these	You don't need these	You don't need these	You don't need these	You don't need these	other options
woman	>80 years	junior college	Urban residents	Divorced	A daughter	Institutions	Town worker medical insurance	Agency institution	6000-9999 RMB	Healthy	In most cases, you can do it yourself	No pain at all	Better energy	often appear	often appear	often appear	often appear	often appear	Know	Community care	Couldn't agree more	Couldn't agree more	Couldn't agree more	Couldn't agree more	No need for home care	No need for community care	Institutional care is required	No need mutual pension	No alternative	supportive	≥4000	Willing to	children	You don't need these	need these	You don't need these	need these	You don't need these	need these	You don't need these	You don't need these	no other options
woman	>80 years	Primary school the following	Urban residents	Married	Two sons	Enterprise employees	Town worker medical insurance	Urban workers or urban and rural residents	≥10000 RMB	General	Totally in need of care	No pain at all	There is no energy	Sometimes appear	Sometimes appear	Sometimes appear	often appear	often appear	Know	Home care					No need for home care	No need for community care	Institutional care is required	No need mutual pension	No alternative	General	≥4000	Willing to	children	You don't need these	You don't need these	need these	need these	need these	You don't need these	You don't need these	You don't need these	no other options
woman	71-75 years	junior college	Urban residents	Married	A son	Institutions	Town worker medical insurance	Agency institution	≥10000 RMB	General	You can take care of yourself	A little bit sore	Energy is ok	Sometimes appear	Sometimes appear	rarely	Sometimes appear	Sometimes appear	Heard about it but didn't understand it	Home care					No need for home care	No need for community care	Institutional care is required	No need mutual pension	No alternative	Excellent supportive	0-999	Willing to	oneself	You don't need these	You don't need these	You don't need these	need these	need these	You don't need these	You don't need these	You don't need these	no other options
man	>80 years	junior college	Urban residents	Single	Two daughters	Enterprise employees	None	Business	6000-9999 RMB000-5999 RMB	Excellent	In most cases, you can do it yourself	No pain at all	Full of energy	rarely	rarely	rarely	Never appear	rarely	Heard about it but didn't understand it	Home care					No need for home care	No need for community care	Institutional care is required	No need mutual pension	No alternative	supportive	≥4000	Very willing to	children	Need these	You don't need these	need these	need these	need these	need these	You don't need these	You don't need these	no other options
man	76-80 years	junior college	Urban residents	Married	A son	Institutions	None	Agency institution	≥10000 RMB	Healthy	You can take care of yourself	A little bit sore	Better energy	often appear	rarely	Never appear	Never appear	Never appear	Heard about it but didn't understand it	Home care					No need for home care	No need for community care	Institutional care is required	No need mutual pension	No alternative	supportive	≥4000	Very willing to	oneself	Need these	You don't need these	You don't need these	You don't need these	You don't need these	You don't need these	need these	You don't need these	no other options
woman	>80 years	junior college	Urban residents	Married	A daughter	Enterprise employees	Town worker medical insurance	Urban workers or urban and rural residents	6000-9999 RMB	General	You can take care of yourself	A little bit sore	Better energy	Sometimes appear	often appear	Sometimes appear	often appear	often appear	Never heard	Community care	Couldn't agree more	Couldn't agree more	general	general	No need for home care	No need for community care	Institutional care is required	Need mutual pension	Other options	General	≥4000	Very willing to	oneself	Need these	You don't need these	need these	need these	You don't need these	You don't need these	You don't need these	You don't need these	no other options
man	>80 years	junior college	Urban residents	Married	A daughter	Enterprise employees	Town worker medical insurance	Urban workers or urban and rural residents	≥10000 RMB	General	You can take care of yourself	No pain at all	Better energy	Always appear	Sometimes appear	often appear	Sometimes appear	rarely	Know	Home care					No need for home care	Community care is needed	No institutional care is required	No need mutual pension	No alternative	Excellent supportive	≥4000	Very willing to	oneself	Need these	need these	need these	You don't need these	need these	You don't need these	need these	You don't need these	no other options
woman	76-80 years	technical secondary school	Urban residents	Married	A daughter	Institutions	Town worker medical insurance	Agency institution	≥10000 RMB	Healthy	You can take care of yourself	A little bit sore	Full of energy	rarely	rarely	Never appear	often appear	rarely	Know	Home care					No need for home care	No need for community care	Institutional care is required	No need mutual pension	No alternative	Excellent supportive	≥4000	Very willing to	oneself	You don't need these	need these	You don't need these	need these	need these	need these	You don't need these	You don't need these	no other options
woman	76-80 years	junior college	Urban residents	Married	0	Enterprise employees	Town worker medical insurance	Agency institution	≥10000 RMB	Excellent	You can take care of yourself	A little bit sore	Full of energy	often appear	rarely	Never appear	Never appear	rarely	Know	Institutional care	Couldn't agree more	Couldn't agree more	Couldn't agree more	general	No need for home care	No need for community care	Institutional care is required	No need mutual pension	No alternative	Excellent supportive	2000-2999	Very reluctant	oneself	You don't need these	need these	You don't need these	need these	need these	need these	need these	need these	no other options
man	>80 years	junior college	Urban residents	Married	Two sons	Enterprise employees	Town worker medical insurance	Agency institution	6000-9999 RMB000-5999 RMB	General	You can take care of yourself	A little bit sore	Full of energy	Sometimes appear	Sometimes appear	rarely	rarely	rarely	Know	Community care	Couldn't agree more	Couldn't agree more	Couldn't agree more	general	Requires home care	No need for community care	No institutional care is required	No need mutual pension	No alternative	supportive	1000-1999	Very willing to	children	You don't need these	You don't need these	You don't need these	You don't need these	You don't need these	You don't need these	You don't need these	You don't need these	no other options
woman	>80years	junior college	Urban residents	Married	Two sons	Institutions	Town worker medical insurance	Agency institution	6000-9999 RMB000-5999 RMB	Excellent	You can take care of yourself	No pain at all	Full of energy	Sometimes appear	Sometimes appear	Sometimes appear	rarely	rarely	Never heard	Home care					No need for home care	No need for community care	Institutional care is required	No need mutual pension	No alternative	supportive	1000-1999	Very willing to	children	Need these	You don't need these	You don't need these	You don't need these	need these	You don't need these	You don't need these	You don't need these	no other options
man	>80 years	junior college	Urban residents	Married	Two sons	Institutions	Town worker medical insurance	Agency institution	≥10000 RMB	General	You can take care of yourself	No pain at all	Full of energy	Sometimes appear	Sometimes appear	Sometimes appear	Sometimes appear	rarely	Know	Community care	Couldn't agree more	Couldn't agree more	Couldn't agree more	agree	No need for home care	No need for community care	Institutional care is required	No need mutual pension	No alternative	Excellent supportive	1000-1999	Very willing to	oneself	Need these	You don't need these	You don't need these	need these	need these	need these	You don't need these	You don't need these	no other options
woman	60-65 years	junior college	Urban residents	Widowed	0	Enterprise employees	Town worker medical insurance	Urban workers or urban and rural residents	6000-9999 RMB000-5999 RMB	General	You can take care of yourself	Moderate pain	Energy is ok	Sometimes appear	Sometimes appear	rarely	rarely	rarely	Know	Home care					Requires home care	Community care is needed	No institutional care is required	Need mutual pension	No alternative	supportive	0-999	Very reluctant	oneself	Need these	need these	You don't need these	need these	need these	need these	need these	You don't need these	no other options
man	>80 years	junior college	Urban residents	Married	A son	Civil servants	endowment insurance、Medical insurance	Agency institution	≥10000 RMB	Excellent	You can take care of yourself	No pain at all	Full of energy	Never appear	Never appear	Never appear	Never appear	Never appear	Know	Institutional care	Couldn't agree more	Couldn't agree more	Couldn't agree more	Couldn't agree more	No need for home care	No need for community care	Institutional care is required	Need mutual pension	No alternative	Excellent supportive	0-999	Very willing to	oneself	Need these	need these	You don't need these	need these	need these	need these	need these	need these	no other options
man	71-75 years	Junior high school	Urban residents	Married	A daughter	Enterprise employees	Town worker medical insurance	Agency institution	6000-9999 RMB	Healthy	You can take care of yourself	No pain at all	Full of energy	Sometimes appear	rarely	often appear	often appear	Sometimes appear	Never heard	Home care					No need for home care	No need for community care	Institutional care is required	No need mutual pension	No alternative	Excellent supportive	≥4000	Very willing to	oneself	Need these	You don't need these	need these	need these	need these	need these	You don't need these	You don't need these	no other options
woman	>80 years	junior college	Urban residents	Married	A daughter	Institutions	Town worker medical insurance	Agency institution	6000-9999 RMB	General	You can take care of yourself	Moderate pain	Better energy	Never appear	Never appear	Never appear	Never appear	Never appear	Know very well	Institutional care	Couldn't agree more	Couldn't agree more	Couldn't agree more	general	No need for home care	Community care is needed	No institutional care is required	No need mutual pension	No alternative	Excellent supportive	0-999	Very willing to	oneself	Need these	You don't need these	need these	You don't need these	need these	You don't need these	You don't need these	You don't need these	no other options
woman	76-80 years	high school	Urban residents	Married	A daughter	Institutions	Town worker medical insurance	Agency institution	≥10000 RMB	Healthy	You can take care of yourself	A little bit sore	Full of energy	rarely	rarely	Never appear	Never appear	Never appear	Know	Institutional care	Couldn't agree more	Couldn't agree more	agree	agree	No need for home care	No need for community care	Institutional care is required	No need mutual pension	No alternative	supportive	≥4000	Very willing to	oneself	Need these	need these	need these	need these	need these	need these	You don't need these	You don't need these	no other options
woman	>80 years	technical secondary school	Urban residents	Married	Two sons	Institutions	endowment insurance、Medical insurance	Agency institution	6000-9999 RMB	Excellent	You can take care of yourself	No pain at all	Full of energy	Never appear	Never appear	Never appear	Never appear	Never appear	Heard about it but didn't understand it	Institutional care	Couldn't agree more	agree	Couldn't agree more	agree	No need for home care	No need for community care	No institutional care is required	Need mutual pension	No alternative	Excellent supportive	≥4000	Very willing to	children	Need these	need these	need these	need these	You don't need these	need these	You don't need these	You don't need these	no other options
woman	66-70 years	junior college	Urban residents	Widowed	0	Civil servants	Town worker medical insurance	Agency institution	6000-9999 RMB	Excellent	You can take care of yourself	No pain at all	Full of energy	Never appear	Never appear	rarely	Sometimes appear	Sometimes appear	Know	Home care					No need for home care	No need for community care	Institutional care is required	No need mutual pension	No alternative	supportive	1000-1999	Very reluctant	oneself	Need these	You don't need these	need these	You don't need these	need these	You don't need these	You don't need these	You don't need these	no other options
woman	>80 years	junior college	Urban residents	Married	Two sons	Institutions	Town worker medical insurance	Agency institution	≥10000 RMB	General	You can take care of yourself	No pain at all	Full of energy	Never appear	Never appear	rarely	rarely	Sometimes appear	Never heard	Home care					No need for home care	No need for community care	Institutional care is required	No need mutual pension	No alternative	Excellent supportive	≥4000	Very willing to	children	Need these	need these	need these	need these	need these	need these	need these	You don't need these	no other options
woman	>80 years	junior college	Urban residents	Married	Two sons	Civil servants	Town worker medical insurance	Agency institution	≥10000 RMB	Healthy	You can take care of yourself	No pain at all	Full of energy	rarely	rarely	rarely	Sometimes appear	rarely	Know very well	Home care					No need for home care	No need for community care	No institutional care is required	Need mutual pension	No alternative	Excellent supportive	≥4000	Very willing to	oneself	You don't need these	You don't need these	need these	need these	You don't need these	You don't need these	You don't need these	You don't need these	other options
man	>80 years	junior college	Urban residents	Married	Two sons	Civil servants	Town worker medical insurance	Agency institution	≥10000 RMB	Healthy	You can take care of yourself	No pain at all	Full of energy	Sometimes appear	Sometimes appear	rarely	rarely	rarely	Know	Home care					No need for home care	No need for community care	No institutional care is required	Need mutual pension	No alternative	Excellent supportive	≥4000	Very willing to	oneself	Need these	You don't need these	need these	need these	You don't need these	You don't need these	You don't need these	You don't need these	other options
woman	76-80 years	Primary school	Urban residents	Divorced	A son	Enterprise employees	Town worker medical insurance	Urban workers or urban and rural residents	<6000-9999 RMB000 RMB	General	In most cases, you can do it yourself	A little bit sore	Energy is ok	often appear	rarely	rarely	rarely	rarely	Heard about it but didn't understand it	Community care	agree	agree	agree	Couldn't agree more	No need for home care	Community care is needed	No institutional care is required	No need mutual pension	No alternative	supportive	0-999	Willing to	children	You don't need these	You don't need these	You don't need these	You don't need these	need these	You don't need these	You don't need these	You don't need these	no other options
woman	>80 years	junior college	Urban residents	Married	A daughter	Institutions	Town worker medical insurance	Agency institution	6000-9999 RMB	Healthy	In most cases, you can do it yourself	Moderate pain	Energy is ok	often appear	Sometimes appear	rarely	rarely	rarely	Know	Institutional care	Couldn't agree more	Couldn't agree more	Couldn't agree more	agree	No need for home care	Community care is needed	No institutional care is required	No need mutual pension	No alternative	supportive	≥4000	Willing to	oneself	You don't need these	need these	You don't need these	need these	need these	need these	need these	need these	no other options
man	76-80 years	junior college	Urban residents	Divorced	A daughter	Institutions	Town worker medical insurance	Urban workers or urban and rural residents	6000-9999 RMB000-5999 RMB	General	You can take care of yourself	No pain at all	Better energy	Sometimes appear	Sometimes appear	rarely	rarely	rarely	Know very well	Institutional care	Couldn't agree more	Couldn't agree more	Couldn't agree more	Couldn't agree more	No need for home care	No need for community care	Institutional care is required	No need mutual pension	No alternative	Excellent supportive	0-999	Willing to	children	Need these	need these	You don't need these	need these	need these	need these	need these	need these	no other options
man	>80 years	junior college	Urban residents	Divorced	Two sons	Enterprise employees	endowment insurance、Medical insurance	Business	6000-9999 RMB	General	In most cases, you can do it yourself	Moderate pain	Low energy	Sometimes appear	rarely	rarely	rarely	rarely	Know	Institutional care	Couldn't agree more	Couldn't agree more	Couldn't agree more	Couldn't agree more	No need for home care	Community care is needed	No institutional care is required	No need mutual pension	No alternative	Excellent supportive	≥4000	Very willing to	oneself	You don't need these	need these	You don't need these	need these	need these	need these	need these	need these	no other options
woman	>80 years	Junior high school	Urban residents	Married	A daughter	Civil servants	Town worker medical insurance	Agency institution	6000-9999 RMB000-5999 RMB	General	You can take care of yourself	A little bit sore	Better energy	Sometimes appear	Sometimes appear	rarely	Sometimes appear	rarely	Never heard	Institutional care	Couldn't agree more	Partial disagree	Couldn't agree more	Couldn't agree more	No need for home care	No need for community care	Institutional care is required	No need mutual pension	No alternative	Excellent supportive	0-999	Very willing to	children	You don't need these	need these	You don't need these	need these	need these	need these	need these	You don't need these	no other options
woman	>80 years	junior college	Urban residents	Divorced	A daughter	Institutions	Town worker medical insurance	Agency institution	6000-9999 RMB	General	In most cases, you can do it yourself	A little bit sore	Better energy	Sometimes appear	Sometimes appear	rarely	rarely	Never appear	Know	Institutional care	Couldn't agree more	general	Couldn't agree more	Couldn't agree more	No need for home care	No need for community care	Institutional care is required	No need mutual pension	No alternative	Excellent supportive	≥4000	Very willing to	children	Need these	need these	need these	need these	need these	need these	need these	need these	no other options
woman	>80 years	Junior high school	Urban residents	Married	Two sons	Enterprise employees	Town worker medical insurance	Urban workers or urban and rural residents	≥10000 RMB	General	You can take care of yourself	No pain at all	Full of energy	Never appear	Never appear	rarely	rarely	rarely	Know	Institutional care	Couldn't agree more	agree	Couldn't agree more	Couldn't agree more	No need for home care	Community care is needed	No institutional care is required	No need mutual pension	No alternative	Excellent supportive	≥4000	Very willing to	children	Need these	need these	You don't need these	need these	need these	need these	You don't need these	You don't need these	no other options
man	60-65 years	high school	Urban residents	Married	A son	Enterprise employees	Town worker medical insurance	Urban workers or urban and rural residents	≥10000 RMB	Excellent	You can take care of yourself	No pain at all	Full of energy	often appear	Sometimes appear	often appear	Always appear	often appear	Know	Home care					No need for home care	No need for community care	Institutional care is required	No need mutual pension	No alternative	Excellent supportive	≥4000	Very willing to	oneself	Need these	need these	need these	need these	need these	need these	You don't need these	You don't need these	no other options
man	76-80 years	junior college	Urban residents	Married	Two sons	Enterprise employees	Town worker medical insurance	Urban workers or urban and rural residents	≥10000 RMB	General	In most cases, you can do it yourself	A little bit sore	Energy is ok	Never appear	Sometimes appear	rarely	Sometimes appear	rarely	Know very well	Home care					No need for home care	No need for community care	Institutional care is required	No need mutual pension	No alternative	Excellent supportive	≥4000	Very willing to	oneself	Need these	need these	need these	need these	need these	need these	need these	need these	no other options
man	>80 years	Junior high school	Urban residents	Married	Two sons	Enterprise employees	Town worker medical insurance	Urban workers or urban and rural residents	6000-9999 RMB000-5999 RMB	Healthy	You can take care of yourself	No pain at all	Full of energy	Always appear	Sometimes appear	often appear	Sometimes appear	rarely	Heard about it but didn't understand it	Home care					No need for home care	No need for community care	Institutional care is required	No need mutual pension	No alternative	Excellent supportive	≥4000	Very willing to	children	You don't need these	need these	You don't need these	need these	You don't need these	need these	You don't need these	You don't need these	no other options
man	>80 years	junior college	Urban residents	Married	Two sons	Civil servants	Town worker medical insurance	Agency institution	6000-9999 RMB	General	You can take care of yourself	No pain at all	Energy is ok	often appear	Always appear	Sometimes appear	often appear	Always appear	Know	Home care					No need for home care	No need for community care	No institutional care is required	Need mutual pension	No alternative	supportive	1000-1999	Willing to	oneself	Need these	You don't need these	You don't need these	You don't need these	need these	You don't need these	You don't need these	You don't need these	no other options
woman	>80 years	Primary school the following	Rural farmers	Divorced	0	Farmers	New rural cooperative	Urban workers or urban and rural residents	<6000-9999 RMB000 RMB	Healthy	You can take care of yourself	A little bit sore	Better energy	Always appear	Sometimes appear	rarely	Sometimes appear	Sometimes appear	Never heard	Home care					No need for home care	No need for community care	Institutional care is required	No need mutual pension	No alternative	supportive	0-999	Very reluctant	oneself	You don't need these	You don't need these	You don't need these	need these	You don't need these	need these	You don't need these	You don't need these	no other options
woman	60-65 years	Primary school the following	Rural farmers	Married	A daughter	Migrant workers	New rural cooperative	Land expropriated farmers business	<6000-9999 RMB000 RMB	General	In most cases, you can do it yourself	A little bit sore	Energy is ok	Sometimes appear	Sometimes appear	rarely	rarely	rarely	Never heard	Community care	Couldn't agree more	Partial disagree	agree	Couldn't agree more	Requires home care	No need for community care	No institutional care is required	No need mutual pension	No alternative	Excellent supportive	1000-1999	general	children	Need these	need these	need these	need these	You don't need these	need these	need these	You don't need these	no other options
man	60-65 years	junior college	Urban residents	Divorced	0	Institutions	None	Agency institution	<6000-9999 RMB000 RMB	Bad	Need someone to take care of	No pain at all	Full of energy	Sometimes appear	Never appear	Never appear	Never appear	Never appear	Never heard	Home care					Requires home care	No need for community care	No institutional care is required	No need mutual pension	No alternative	supportive	0-999	general	oneself	Need these	need these	need these	need these	need these	need these	need these	need these	no other options
woman	60-65 years	Junior high school	Rural farmers	Widowed	A daughter	Self-employed	None	Urban workers or urban and rural residents	6000-9999 RMB000-5999 RMB	Bad	Need someone to take care of	A lot of pain	Low energy	rarely	Never appear	Never appear	Never appear	Never appear	Never heard	Home care					Requires home care	No need for community care	No institutional care is required	No need mutual pension	No alternative	General	3000-3999	general	oneself	Need these	need these	You don't need these	You don't need these	You don't need these	You don't need these	You don't need these	need these	no other options
woman	>80 years	Primary school	Rural farmers	Divorced	A daughter	Farmers	New rural cooperative	Urban workers or urban and rural residents	≥10000 RMB	Healthy	In most cases, you can do it yourself	No pain at all	Better energy	Sometimes appear	rarely	rarely	rarely	Sometimes appear	Never heard	Community care	agree	general	Couldn't agree more	Couldn't agree more	Requires home care	No need for community care	No institutional care is required	No need mutual pension	No alternative	supportive	1000-1999	Willing to	children	Need these	You don't need these	You don't need these	need these	need these	need these	You don't need these	You don't need these	no other options
woman	60-65 years	Junior high school	Rural farmers	Widowed	A son	Self-employed	New rural cooperative	Land expropriated farmers business	<6000-9999 RMB000 RMB	Healthy	In most cases, you can do it yourself	No pain at all	Better energy	rarely	rarely	rarely	rarely	rarely	Heard about it but didn't understand it	Community care	Couldn't agree more	agree	agree	Couldn't agree more	No need for home care	No need for community care	Institutional care is required	No need mutual pension	No alternative	supportive	1000-1999	Very willing to	Other family members	You don't need these	You don't need these	You don't need these	need these	You don't need these	You don't need these	You don't need these	You don't need these	no other options
woman	60-65 years	Primary school	Rural farmers	Widowed	A son	Migrant workers	New rural cooperative	Urban workers or urban and rural residents	<6000-9999 RMB000 RMB	Healthy	You can take care of yourself	No pain at all	Better energy	rarely	rarely	Sometimes appear	Sometimes appear	rarely	Never heard	Home care					Requires home care	No need for community care	Institutional care is required	No need mutual pension	No alternative	General	0-999	general	oneself	You don't need these	You don't need these	You don't need these	You don't need these	need these	need these	You don't need these	You don't need these	no other options
woman	60-65 years	Primary school	Rural farmers	Married	A son	Migrant workers	Urban residents medical treatment	Urban workers or urban and rural residents	≥10000 RMB	Excellent	You can take care of yourself	No pain at all	Full of energy	often appear	often appear	often appear	often appear	often appear	Know	Home care					No need for home care	No need for community care	Institutional care is required	No need mutual pension	No alternative	supportive	1000-1999	Willing to	oneself	You don't need these	You don't need these	You don't need these	need these	need these	need these	need these	You don't need these	no other options
woman	>80 years	Primary school	Urban residents	Divorced	Two daughters	Migrant workers	Town worker medical insurance	Urban workers or urban and rural residents	6000-9999 RMB000-5999 RMB	Bad	You can take care of yourself	A little bit sore	Full of energy	rarely	rarely	rarely	rarely	Never appear	Never heard	Home care					No need for home care	No need for community care	Institutional care is required	No need mutual pension	No alternative	Excellent supportive	0-999	Very willing to	children	Need these	You don't need these	need these	need these	need these	need these	need these	You don't need these	no other options
man	60-65 years	Junior high school	Rural farmers	Married	A son	Migrant workers	New rural cooperative	Urban workers or urban and rural residents	<6000-9999 RMB000 RMB	Healthy	In most cases, you can do it yourself	A little bit sore	Better energy	Sometimes appear	rarely	Sometimes appear	often appear	often appear	Heard about it but didn't understand it	Home care					No need for home care	No need for community care	Institutional care is required	No need mutual pension	No alternative	Don't support	3000-3999	Willing to	children	You don't need these	You don't need these	You don't need these	You don't need these	You don't need these	You don't need these	You don't need these	You don't need these	other options
woman	66-70 years	Primary school the following	Rural farmers	Married	A daughter	Civil servants	New rural cooperative	Land expropriated farmers business	≥10000 RMB	Excellent	You can take care of yourself	No pain at all	Full of energy	rarely	Never appear	rarely	rarely	rarely	Know very well	Home care					Requires home care	Community care is needed	No institutional care is required	No need mutual pension	No alternative	Excellent supportive	2000-2999	Very willing to	oneself	Need these	need these	need these	need these	need these	need these	need these	need these	no other options
woman	>80 years	junior college	Urban residents	Divorced	0	Institutions	Town worker medical insurance	Agency institution	6000-9999 RMB	General	Need someone to take care of	No pain at all	Low energy	Always appear	Sometimes appear	Always appear	Sometimes appear	Always appear	Heard about it but didn't understand it	Home care					Requires home care	No need for community care	Institutional care is required	No need mutual pension	No alternative	supportive	≥4000	Very willing to	oneself	Need these	need these	need these	need these	need these	need these	You don't need these	You don't need these	no other options
woman	66-70 years	junior college	Rural farmers	Divorced	Two daughters	Farmers	None	None	≥10000 RMB	Bad	You can take care of yourself	Moderate pain	Low energy	Always appear	often appear	Always appear	Sometimes appear	Always appear	Know	Community care	Couldn't agree more	Couldn't agree more	Couldn't agree more	Couldn't agree more	No need for home care	Community care is needed	No institutional care is required	No need mutual pension	No alternative	Excellent supportive	≥4000	Very willing to	oneself	Need these	need these	need these	need these	need these	need these	need these	need these	no other options
woman	>80 years	Primary school	Rural farmers	Divorced	Two daughters	Enterprise employees	Town worker medical insurance	Urban workers or urban and rural residents	6000-9999 RMB000-5999 RMB	Bad	Need someone to take care of	Severe pain	Low energy	often appear	Sometimes appear	rarely	rarely	rarely	Never heard	Institutional care	Couldn't agree more	general	Couldn't agree more	Couldn't agree more	Requires home care	No need for community care	No institutional care is required	No need mutual pension	No alternative	supportive	1000-1999	Very willing to	oneself	You don't need these	You don't need these	You don't need these	You don't need these	You don't need these	You don't need these	You don't need these	You don't need these	no other options
man	71-75 years	high school	Urban residents	Married	A daughter	Institutions	Town worker medical insurance	Agency institution	6000-9999 RMB	General	Need someone to take care of	Moderate pain	Low energy	Never appear	Never appear	Never appear	Never appear	Never appear	Heard about it but didn't understand it	Home care					Requires home care	No need for community care	No institutional care is required	No need mutual pension	No alternative	supportive	2000-2999	Willing to	oneself	Need these	need these	need these	need these	need these	need these	need these	You don't need these	no other options
man	>80 years	Junior high school	Urban residents	Married	Two sons	Civil servants	Town worker medical insurance	Agency institution	≥10000 RMB	General	In most cases, you can do it yourself	A little bit sore	Low energy	Sometimes appear	Never appear	rarely	rarely	Never appear	Heard about it but didn't understand it	Home care					No need for home care	No need for community care	Institutional care is required	No need mutual pension	No alternative	supportive	0-999	Willing to	oneself	You don't need these	You don't need these	You don't need these	need these	You don't need these	need these	You don't need these	You don't need these	no other options
woman	>80 years	junior college	Urban residents	Married	A daughter	Institutions	Urban residents medical treatment	Agency institution	≥10000 RMB	Healthy	You can take care of yourself	No pain at all	Full of energy	rarely	Never appear	rarely	rarely	rarely	Know	Home care					No need for home care	No need for community care	Institutional care is required	Need mutual pension	No alternative	supportive	≥4000	Willing to	children	Need these	You don't need these	need these	need these	need these	You don't need these	You don't need these	You don't need these	no other options
woman	>80 years	Primary school	Rural farmers	Divorced	Two sons	Enterprise employees	Urban residents medical treatment	Urban workers or urban and rural residents	6000-9999 RMB000-5999 RMB	Healthy	In most cases, you can do it yourself	No pain at all	Better energy	Sometimes appear	Sometimes appear	Sometimes appear	Sometimes appear	Sometimes appear	Know	Home care					No need for home care	No need for community care	Institutional care is required	No need mutual pension	No alternative	supportive	3000-3999	Willing to	children	Need these	You don't need these	need these	You don't need these	You don't need these	need these	You don't need these	You don't need these	no other options
man	>80 years	Primary school	Urban residents	Married	A son and a daughter	Civil servants	Town worker medical insurance	Agency institution	6000-9999 RMB	Healthy	You can take care of yourself	No pain at all	Better energy	rarely	rarely	Never appear	Never appear	Never appear	Never heard	Institutional care	Couldn't agree more	agree	Couldn't agree more	Couldn't agree more	Requires home care	No need for community care	No institutional care is required	No need mutual pension	No alternative	General	≥4000	Willing to	oneself	Need these	You don't need these	You don't need these	need these	You don't need these	You don't need these	You don't need these	You don't need these	no other options
woman	60-65 years	Primary school	Rural farmers	Married	A daughter	Migrant workers	New rural cooperative	Urban workers or urban and rural residents	6000-9999 RMB	Excellent	You can take care of yourself	A little bit sore	Full of energy	rarely	Never appear	Never appear	Sometimes appear	rarely	Know	Home care					Requires home care	No need for community care	No institutional care is required	No need mutual pension	No alternative	supportive	0-999	general	oneself	Need these	You don't need these	need these	need these	You don't need these	need these	You don't need these	You don't need these	other options
man	66-70 years	junior college	Urban residents	Married	A son	Enterprise employees	Town worker medical insurance	Urban workers or urban and rural residents	≥10000 RMB	Excellent	You can take care of yourself	No pain at all	Full of energy	rarely	Never appear	Never appear	Never appear	Never appear	Heard about it but didn't understand it	Home care					Requires home care	No need for community care	Institutional care is required	No need mutual pension	No alternative	Excellent supportive	≥4000	Willing to	oneself	You don't need these	need these	You don't need these	need these	need these	need these	You don't need these	You don't need these	no other options
woman	>80 years	Primary school	Urban residents	Married	A daughter	Enterprise employees	Town worker medical insurance	Urban workers or urban and rural residents	6000-9999 RMB000-5999 RMB	General	Need someone to take care of	Moderate pain	Low energy	rarely	rarely	rarely	Never appear	Sometimes appear	Heard about it but didn't understand it	Community care	agree	agree	agree	Couldn't agree more	Requires home care	Community care is needed	Institutional care is required	Need mutual pension	No alternative	supportive	≥4000	Willing to	children	Need these	need these	You don't need these	need these	need these	need these	You don't need these	You don't need these	no other options
woman	60-65 years	Primary school the following	Rural farmers	Married	A son	Farmers	None	Urban workers or urban and rural residents	≥10000 RMB	Excellent	You can take care of yourself	No pain at all	Full of energy	often appear	Sometimes appear	often appear	Sometimes appear	rarely	Know very well	Home care					Requires home care	No need for community care	No institutional care is required	No need mutual pension	No alternative	supportive	0-999	Willing to	oneself	Need these	need these	need these	need these	need these	need these	need these	need these	no other options
man	>80 years	technical secondary school	Urban residents	Divorced	A son	Civil servants	Town worker medical insurance	Agency institution	6000-9999 RMB	General	In most cases, you can do it yourself	A little bit sore	Energy is ok	Always appear	Always appear	Always appear	often appear	often appear	Heard about it but didn't understand it	Home care					No need for home care	No need for community care	Institutional care is required	No need mutual pension	No alternative	Don't support	≥4000	Willing to	oneself	You don't need these	You don't need these	need these	You don't need these	You don't need these	You don't need these	You don't need these	You don't need these	other options
man	>80 years	junior college	Urban residents	Divorced	A daughter	Civil servants	Town worker medical insurance	Agency institution	6000-9999 RMB	General	You can take care of yourself	No pain at all	Energy is ok	Sometimes appear	rarely	Sometimes appear	often appear	often appear	Never heard	Institutional care	Couldn't agree more	Couldn't agree more	Couldn't agree more	Couldn't agree more	Requires home care	No need for community care	No institutional care is required	No need mutual pension	No alternative	supportive	≥4000	Very willing to	oneself	Need these	You don't need these	You don't need these	need these	You don't need these	You don't need these	You don't need these	You don't need these	no other options
woman	60-65 years	high school	Urban residents	Married	A son	Enterprise employees	Commercial insurance	Urban workers or urban and rural residents	6000-9999 RMB000-5999 RMB	General	You can take care of yourself	No pain at all	Energy is ok	often appear	often appear	often appear	Always appear	Always appear	Know	Home care					Requires home care	Community care is needed	No institutional care is required	No need mutual pension	No alternative	Excellent supportive	2000-2999	Very willing to	children	Need these	You don't need these	You don't need these	You don't need these	need these	You don't need these	You don't need these	You don't need these	no other options
woman	60-65 years	Primary school the following	Rural farmers	Divorced	A son and a daughter	Farmers	New rural cooperative	Land expropriated farmers business	≥10000 RMB	General	In most cases, you can do it yourself	No pain at all	Full of energy	often appear	Always appear	Sometimes appear	often appear	often appear	Know	Other	Couldn't agree more	Couldn't agree more	Couldn't agree more	agree	Requires home care	No need for community care	Institutional care is required	No need mutual pension	No alternative	supportive	≥4000	Willing to	children	You don't need these	You don't need these	need these	You don't need these	You don't need these	You don't need these	You don't need these	You don't need these	other options
man	>80 years	junior college	Urban residents	Married	Two sons	Civil servants	Town worker medical insurance	Agency institution	6000-9999 RMB	General	Need someone to take care of	No pain at all	Low energy	Always appear	often appear	Always appear	Always appear	often appear	Heard about it but didn't understand it	Home care					Requires home care	No need for community care	Institutional care is required	No need mutual pension	No alternative	supportive	≥4000	Willing to	oneself	You don't need these	You don't need these	You don't need these	need these	need these	need these	need these	You don't need these	no other options
woman	>80 years	Primary school the following	Urban residents	Divorced	A daughter	Others	Town worker medical insurance	Urban workers or urban and rural residents	≥10000 RMB	General	Need someone to take care of	A little bit sore	Better energy	Never appear	rarely	Never appear	Never appear	rarely	Never heard	Home care					Requires home care	No need for community care	Institutional care is required	No need mutual pension	No alternative	supportive	1000-1999	Willing to	children	You don't need these	You don't need these	You don't need these	need these	You don't need these	need these	You don't need these	You don't need these	no other options
man	>80 years	Junior high school	Urban residents	Divorced	A daughter	Institutions	Town worker medical insurance	Urban workers or urban and rural residents	<6000-9999 RMB000 RMB	Healthy	In most cases, you can do it yourself	Moderate pain	Energy is ok	often appear	often appear	often appear	Sometimes appear	rarely	Never heard	Home care					Requires home care	No need for community care	No institutional care is required	No need mutual pension	No alternative	supportive	≥4000	general	oneself	Need these	You don't need these	You don't need these	need these	You don't need these	You don't need these	You don't need these	need these	no other options
woman	60-65 years	Junior high school	Urban residents	Married	A son	Self-employed	Town worker medical insurance	Urban workers or urban and rural residents	6000-9999 RMB	Excellent	You can take care of yourself	No pain at all	Full of energy	Never appear	Never appear	Never appear	Never appear	Never appear	Know very well	Home care					Requires home care	No need for community care	Institutional care is required	No need mutual pension	No alternative	Excellent supportive	≥4000	Very willing to	oneself	Need these	need these	need these	need these	need these	need these	You don't need these	need these	no other options
woman	>80 years	Primary school the following	Urban residents	Divorced	A son and a daughter	Institutions	Town worker medical insurance	Urban workers or urban and rural residents	≥10000 RMB	Excellent	In most cases, you can do it yourself	No pain at all	Better energy	Sometimes appear	rarely	often appear	Sometimes appear	often appear	Never heard	Community care	Couldn't agree more	Couldn't agree more	Couldn't agree more	Couldn't agree more	No need for home care	No need for community care	Institutional care is required	No need mutual pension	No alternative	supportive	≥4000	Willing to	oneself	Need these	need these	You don't need these	need these	need these	need these	need these	need these	no other options
man	>80 years	Primary school the following	Urban residents	Divorced	A daughter	Enterprise employees	Town worker medical insurance	Agency institution	6000-9999 RMB000-5999 RMB	General	In most cases, you can do it yourself	No pain at all	Full of energy	Sometimes appear	rarely	Never appear	rarely	rarely	Know	Home care					No need for home care	No need for community care	Institutional care is required	No need mutual pension	No alternative	Excellent supportive	3000-3999	Willing to	oneself	Need these	You don't need these	You don't need these	need these	need these	need these	You don't need these	You don't need these	no other options
woman	66-70 years	Primary school	Rural farmers	Married	A daughter	Migrant workers	Town worker medical insurance	Land expropriated farmers business	≥10000 RMB	Excellent	You can take care of yourself	A little bit sore	Full of energy	Never appear	Never appear	Never appear	Never appear	Never appear	Know	Home care					Requires home care	No need for community care	No institutional care is required	No need mutual pension	No alternative	Excellent supportive	0-999	general	oneself	You don't need these	You don't need these	need these	need these	need these	need these	You don't need these	You don't need these	no other options
man	60-65 years	Junior high school	Rural farmers	Single	0	Farmers	None	Business	<6000-9999 RMB000 RMB	Healthy	In most cases, you can do it yourself	No pain at all	Better energy	rarely	rarely	rarely	rarely	rarely	Never heard	Community care	agree	Partial disagree	general	Couldn't agree more	Requires home care	No need for community care	No institutional care is required	No need mutual pension	No alternative	supportive	0-999	Very reluctant	Other family members	You don't need these	You don't need these	need these	need these	need these	need these	You don't need these	You don't need these	no other options
man	>80 years	Primary school	Urban residents	Divorced	A son and a daughter	Enterprise employees	Town worker medical insurance	Urban workers or urban and rural residents	6000-9999 RMB000-5999 RMB	General	In most cases, you can do it yourself	No pain at all	Energy is ok	Sometimes appear	Sometimes appear	Sometimes appear	Sometimes appear	Sometimes appear	Know	Home care					No need for home care	Community care is needed	No institutional care is required	No need mutual pension	No alternative	supportive	3000-3999	general	oneself	You don't need these	You don't need these	You don't need these	You don't need these	need these	You don't need these	You don't need these	You don't need these	no other options
man	66-70 years	Junior high school	Rural farmers	Married	A daughter	Migrant workers	New rural cooperative	Land expropriated farmers business	≥10000 RMB	Excellent	You can take care of yourself	No pain at all	Full of energy	Sometimes appear	Sometimes appear	rarely	rarely	rarely	Know	Home care					Requires home care	No need for community care	No institutional care is required	No need mutual pension	No alternative	supportive	0-999	general	oneself	You don't need these	need these	You don't need these	need these	need these	need these	You don't need these	You don't need these	no other options
woman	60-65 years	Primary school the following	Rural farmers	Divorced	A son	Migrant workers	New rural cooperative	Urban workers or urban and rural residents	≥10000 RMB	Excellent	You can take care of yourself	No pain at all	Full of energy	Never appear	Never appear	Never appear	Never appear	Never appear	Never heard	Home care					No need for home care	No need for community care	No institutional care is required	Need mutual pension	No alternative	supportive	1000-1999	Willing to	oneself	You don't need these	You don't need these	need these	need these	need these	need these	You don't need these	need these	no other options
woman	>80 years	Primary school	Urban residents	Married	A son	Migrant workers	Commercial insurance	Urban workers or urban and rural residents	<6000-9999 RMB000 RMB	General	Need someone to take care of	A little bit sore	Better energy	often appear	Sometimes appear	often appear	often appear	Always appear	Never heard	Home care					Requires home care	No need for community care	No institutional care is required	No need mutual pension	No alternative	General	0-999	Very willing to	children	You don't need these	You don't need these	need these	need these	You don't need these	You don't need these	You don't need these	You don't need these	no other options
woman	60-65 years	Primary school the following	Rural farmers	Married	A daughter	Farmers	Commercial insurance	Business	6000-9999 RMB000-5999 RMB	Bad	In most cases, you can do it yourself	A little bit sore	Energy is ok	Always appear	often appear	often appear	Always appear	often appear	Never heard	Institutional care	Couldn't agree more	Couldn't agree more	Couldn't agree more	Couldn't agree more	No need for home care	No need for community care	Institutional care is required	No need mutual pension	No alternative	General	0-999	Reluctant to	oneself	You don't need these	You don't need these	You don't need these	need these	You don't need these	You don't need these	You don't need these	You don't need these	no other options
woman	>80 years	high school	Urban residents	Married	Two sons	Enterprise employees	Urban residents medical treatment	Urban workers or urban and rural residents	≥10000 RMB	General	In most cases, you can do it yourself	A little bit sore	Better energy	rarely	often appear	Always appear	often appear	Sometimes appear	Heard about it but didn't understand it	Institutional care	agree	Couldn't agree more	Couldn't agree more	agree	Requires home care	No need for community care	No institutional care is required	No need mutual pension	No alternative	Excellent supportive	0-999	Very willing to	spouse	You don't need these	need these	You don't need these	need these	need these	need these	need these	need these	no other options
man	>80 years	high school	Urban residents	Married	Two sons	Enterprise employees	Urban residents medical treatment	Urban workers or urban and rural residents	≥10000 RMB	Bad	Need someone to take care of	Moderate pain	Low energy	Never appear	Sometimes appear	often appear	Sometimes appear	Never appear	Know	Institutional care	general	Couldn't agree more	agree	agree	No need for home care	No need for community care	No institutional care is required	No need mutual pension	Other options	Excellent supportive	0-999	Willing to	spouse	You don't need these	You don't need these	need these	need these	need these	You don't need these	You don't need these	need these	other options
man	>80 years	Junior high school	Urban residents	Divorced	Two sons	Migrant workers	Town worker medical insurance	Urban workers or urban and rural residents	≥10000 RMB	Healthy	You can take care of yourself	No pain at all	Full of energy	rarely	Never appear	Never appear	Never appear	rarely	Heard about it but didn't understand it	Institutional care	Couldn't agree more	Couldn't agree more	Couldn't agree more	general	No need for home care	No need for community care	Institutional care is required	No need mutual pension	No alternative	supportive	3000-3999	Willing to	children	You don't need these	You don't need these	You don't need these	You don't need these	need these	You don't need these	You don't need these	You don't need these	no other options
man	>80 years	Junior high school	Urban residents	Married	A daughter	Enterprise employees	Town worker medical insurance	Urban workers or urban and rural residents	≥10000 RMB	Healthy	You can take care of yourself	No pain at all	Energy is ok	rarely	rarely	Sometimes appear	rarely	rarely	Know	Institutional care	Couldn't agree more	agree	Couldn't agree more	Couldn't agree more	Requires home care	No need for community care	No institutional care is required	No need mutual pension	No alternative	Don't support	≥4000	Willing to	oneself	Need these	You don't need these	You don't need these	You don't need these	need these	need these	need these	You don't need these	no other options
man	>80 years	Primary school	Urban residents	Divorced	A daughter	Enterprise employees	Town worker medical insurance	Urban workers or urban and rural residents	<6000-9999 RMB000 RMB	Healthy	You can take care of yourself	No pain at all	Better energy	rarely	rarely	rarely	rarely	rarely	Heard about it but didn't understand it	Institutional care	Couldn't agree more	agree	Couldn't agree more	Couldn't agree more	No need for home care	No need for community care	Institutional care is required	No need mutual pension	No alternative	supportive	≥4000	Willing to	children	You don't need these	You don't need these	You don't need these	You don't need these	You don't need these	need these	need these	You don't need these	no other options
man	>80 years	high school	Urban residents	Divorced	A daughter	Institutions	Town worker medical insurance	Agency institution	5	Healthy	You can take care of yourself	A little bit sore	Better energy	Never appear	Sometimes appear	Never appear	rarely	Never appear	Know	Institutional care	Couldn't agree more	general	Couldn't agree more	agree	No need for home care	No need for community care	Institutional care is required	No need mutual pension	No alternative	Excellent supportive	≥4000	Willing to	oneself	You don't need these	You don't need these	You don't need these	You don't need these	need these	You don't need these	You don't need these	You don't need these	no other options
man	71-75 years	high school	Urban residents	Married	A daughter	Enterprise employees	Town worker medical insurance	Urban workers or urban and rural residents	6000-9999 RMB000-5999 RMB	Healthy	In most cases, you can do it yourself	No pain at all	Better energy	Sometimes appear	Sometimes appear	often appear	Sometimes appear	Sometimes appear	Know	Institutional care	agree	agree	agree	agree	Requires home care	No need for community care	No institutional care is required	No need mutual pension	No alternative	supportive	3000-3999	Willing to	children	You don't need these	need these	You don't need these	need these	need these	You don't need these	You don't need these	You don't need these	no other options
woman	>80 years	Primary school the following	Urban residents	Married	Two daughters	Institutions	None	None	≥10000 RMB	Healthy	In most cases, you can do it yourself	No pain at all	Full of energy	rarely	rarely	rarely	rarely	rarely	Never heard	Institutional care	general	agree	agree	Couldn't agree more	Requires home care	Community care is needed	Institutional care is required	Need mutual pension	No alternative	supportive	3000-3999	Willing to	oneself	You don't need these	need these	You don't need these	need these	need these	You don't need these	need these	You don't need these	no other options
woman	66-70 years	Primary school	Rural farmers	Married	A daughter	Farmers	None	Land expropriated farmers business	6000-9999 RMB000-5999 RMB	Healthy	You can take care of yourself	A little bit sore	Better energy	Never appear	Never appear	Never appear	Never appear	Never appear	Heard about it but didn't understand it	Home care					No need for home care	No need for community care	Institutional care is required	No need mutual pension	No alternative	General	2000-2999	Willing to	oneself	You don't need these	You don't need these	You don't need these	need these	need these	You don't need these	You don't need these	need these	no other options
woman	>80 years	Primary school the following	Rural farmers	Divorced	A son	Institutions	New rural cooperative	Urban workers or urban and rural residents	<6000-9999 RMB000 RMB	General	In most cases, you can do it yourself	A little bit sore	Energy is ok	often appear	rarely	rarely	rarely	rarely	Never heard	Institutional care	agree	agree	Couldn't agree more	Couldn't agree more	No need for home care	No need for community care	Institutional care is required	No need mutual pension	No alternative	supportive	2000-2999	Very willing to	oneself	You don't need these	You don't need these	You don't need these	You don't need these	You don't need these	You don't need these	You don't need these	You don't need these	other options
man	>80 years	bachelor degree or above	Rural farmers	Divorced	A daughter	Institutions	New rural cooperative	Agency institution	<6000-9999 RMB000 RMB	General	In most cases, you can do it yourself	Moderate pain	Energy is ok	rarely	Never appear	rarely	rarely	rarely	Never heard	Institutional care	Couldn't agree more	general	Couldn't agree more	general	No need for home care	No need for community care	Institutional care is required	No need mutual pension	No alternative	Excellent supportive	≥4000	Very willing to	oneself	You don't need these	You don't need these	need these	need these	You don't need these	You don't need these	You don't need these	You don't need these	no other options
woman	76-80 years	Primary school	Urban residents	Married	A daughter	Institutions	Town worker medical insurance	Agency institution	6000-9999 RMB000-5999 RMB	General	You can take care of yourself	A little bit sore	Better energy	Never appear	Never appear	Never appear	Never appear	rarely	Never heard	Institutional care	Couldn't agree more	general	general	agree	Requires home care	No need for community care	No institutional care is required	No need mutual pension	No alternative	General	3000-3999	Willing to	children	You don't need these	You don't need these	You don't need these	You don't need these	need these	You don't need these	You don't need these	You don't need these	no other options
woman	>80 years	Primary school the following	Rural farmers	Divorced	A son and a daughter	Farmers	New rural cooperative	Land expropriated farmers business	<6000-9999 RMB000 RMB	General	In most cases, you can do it yourself	A little bit sore	Energy is ok	Never appear	Never appear	Never appear	Never appear	Never appear	Never heard	Institutional care	Couldn't agree more	Partial disagree	agree	agree	No need for home care	No need for community care	Institutional care is required	No need mutual pension	No alternative	supportive	2000-2999	Willing to	children	You don't need these	You don't need these	You don't need these	You don't need these	You don't need these	You don't need these	need these	You don't need these	no other options
man	71-75 years	Primary school	Rural farmers	Married	A daughter	Enterprise employees	New rural cooperative	Urban workers or urban and rural residents	6000-9999 RMB	General	You can take care of yourself	A little bit sore	Better energy	Never appear	Never appear	Never appear	Never appear	rarely	Know	Home care					Requires home care	No need for community care	No institutional care is required	No need mutual pension	No alternative	supportive	2000-2999	Willing to	oneself	You don't need these	need these	You don't need these	need these	need these	You don't need these	need these	You don't need these	no other options
woman	66-70 years	Primary school	Rural farmers	Married	A daughter	Enterprise employees	New rural cooperative	Urban workers or urban and rural residents	6000-9999 RMB	General	You can take care of yourself	A little bit sore	Better energy	Never appear	Never appear	Never appear	rarely	Never appear	Never heard	Home care					Requires home care	No need for community care	No institutional care is required	No need mutual pension	No alternative	supportive	2000-2999	Willing to	oneself	You don't need these	need these	You don't need these	You don't need these	need these	You don't need these	You don't need these	You don't need these	other options
woman	71-75 years	Primary school	Rural farmers	Married	A daughter	Self-employed	New rural cooperative	Land expropriated farmers business	<6000-9999 RMB000 RMB	Healthy	You can take care of yourself	A little bit sore	Better energy	Never appear	Never appear	Never appear	Never appear	Never appear	Never heard	Home care					Requires home care	Community care is needed	Institutional care is required	No need mutual pension	No alternative	supportive	2000-2999	general	oneself	You don't need these	need these	You don't need these	You don't need these	You don't need these	You don't need these	You don't need these	need these	no other options
man	76-80 years	Primary school	Rural farmers	Married	A daughter	Self-employed	New rural cooperative	Land expropriated farmers business	<6000-9999 RMB000 RMB	General	In most cases, you can do it yourself	A little bit sore	Better energy	Never appear	Never appear	Never appear	Never appear	Never appear	Never heard	Home care					Requires home care	No need for community care	Institutional care is required	No need mutual pension	No alternative	supportive	2000-2999	general	oneself	You don't need these	need these	You don't need these	You don't need these	You don't need these	You don't need these	need these	You don't need these	no other options
man	>80 years	high school	Rural farmers	Divorced	A daughter	Institutions	Town worker medical insurance	Agency institution	6000-9999 RMB	Healthy	You can take care of yourself	No pain at all	Full of energy	Never appear	Never appear	Never appear	Never appear	Never appear	Never heard	Institutional care	general	agree	agree	general	No need for home care	No need for community care	Institutional care is required	No need mutual pension	No alternative	Excellent supportive	0-999	Willing to	children	You don't need these	You don't need these	You don't need these	You don't need these	You don't need these	You don't need these	You don't need these	You don't need these	other options
woman	>80 years	Primary school the following	Rural farmers	Divorced	Two daughters	Farmers	New rural cooperative	Land expropriated farmers business	<6000-9999 RMB000 RMB	Healthy	In most cases, you can do it yourself	A little bit sore	Energy is ok	Never appear	Never appear	rarely	Never appear	Never appear	Never heard	Institutional care	Couldn't agree more	Partial disagree	agree	Couldn't agree more	No need for home care	No need for community care	Institutional care is required	No need mutual pension	No alternative	supportive	0-999	Willing to	children	You don't need these	need these	You don't need these	You don't need these	need these	You don't need these	You don't need these	You don't need these	other options
woman	76-80 years	technical secondary school	Urban residents	Divorced	A son	Institutions	Town worker medical insurance	Agency institution	<6000-9999 RMB000 RMB	General	In most cases, you can do it yourself	No pain at all	Full of energy	Never appear	Never appear	Never appear	Never appear	Never appear	Never heard	Institutional care	agree	Partial disagree	agree	general	No need for home care	No need for community care	Institutional care is required	No need mutual pension	No alternative	Excellent supportive	≥4000	general	professionals	Need these	need these	need these	need these	need these	need these	need these	need these	no other options
woman	>80 years	Primary school the following	Rural farmers	Divorced	A son and a daughter	Self-employed	New rural cooperative	Land expropriated farmers business	<6000-9999 RMB000 RMB	General	In most cases, you can do it yourself	Moderate pain	Better energy	Never appear	Never appear	Never appear	Never appear	Never appear	Never heard	Institutional care	Couldn't agree more	Partial disagree	general	general	No need for home care	No need for community care	Institutional care is required	No need mutual pension	No alternative	General	0-999	general	children	You don't need these	need these	You don't need these	You don't need these	You don't need these	You don't need these	You don't need these	You don't need these	no other options
woman	71-75 years	Primary school the following	Rural farmers	Married	Two sons	Farmers	New rural cooperative	Business	6000-9999 RMB000-5999 RMB	Healthy	In most cases, you can do it yourself	No pain at all	Better energy	rarely	Never appear	rarely	rarely	Sometimes appear	Never heard	Institutional care	general	general	agree	Couldn't agree more	Requires home care	No need for community care	Institutional care is required	No need mutual pension	No alternative	General	0-999	general	children	You don't need these	You don't need these	You don't need these	You don't need these	need these	You don't need these	need these	You don't need these	no other options
woman	66-70 years	Primary school the following	Rural farmers	Married	A daughter	Farmers	None	None	6000-9999 RMB	General	You can take care of yourself	A little bit sore	Better energy	Never appear	Never appear	Never appear	Never appear	Never appear	Never heard	Home care					Requires home care	No need for community care	No institutional care is required	No need mutual pension	No alternative	General	0-999	Willing to	oneself	You don't need these	need these	You don't need these	You don't need these	need these	You don't need these	You don't need these	You don't need these	no other options
man	>80 years	Primary school	Rural farmers	Divorced	A son and a daughter	Farmers	New rural cooperative	Land expropriated farmers business	<6000-9999 RMB000 RMB	General	You can take care of yourself	A little bit sore	Energy is ok	rarely	Never appear	Never appear	Never appear	Never appear	Never heard	Institutional care	Couldn't agree more	agree	agree	agree	Requires home care	No need for community care	No institutional care is required	No need mutual pension	No alternative	supportive	1000-1999	Willing to	oneself	You don't need these	need these	You don't need these	You don't need these	You don't need these	You don't need these	You don't need these	You don't need these	no other options
man	71-75 years	Junior high school	Rural farmers	Married	A daughter	Farmers	New rural cooperative	Urban workers or urban and rural residents	<6000-9999 RMB000 RMB	Healthy	You can take care of yourself	Moderate pain	Energy is ok	rarely	rarely	rarely	rarely	rarely	Never heard	Home care					Requires home care	Community care is needed	No institutional care is required	No need mutual pension	No alternative	supportive	1000-1999	Willing to	children	You don't need these	need these	You don't need these	You don't need these	need these	You don't need these	need these	You don't need these	no other options
woman	66-70 years	Primary school the following	Rural farmers	Married	A daughter	Farmers	New rural cooperative	Urban workers or urban and rural residents	<6000-9999 RMB000 RMB	Healthy	You can take care of yourself	A little bit sore	Better energy	rarely	rarely	rarely	rarely	rarely	Never heard	Home care					Requires home care	Community care is needed	No institutional care is required	Need mutual pension	No alternative	supportive	1000-1999	Willing to	children	You don't need these	need these	You don't need these	need these	need these	You don't need these	need these	You don't need these	no other options
man	60-65 years	junior college	Urban residents	Married	A daughter	Civil servants	Town worker medical insurance	None	6000-9999 RMB	Healthy	In most cases, you can do it yourself	A little bit sore	Energy is ok	rarely	Sometimes appear	rarely	Sometimes appear	Sometimes appear	Know	Community care	general	general	general	general	Requires home care	Community care is needed	No institutional care is required	No need mutual pension	No alternative	supportive	2000-2999	general	oneself	Need these	need these	You don't need these	need these	need these	You don't need these	You don't need these	You don't need these	no other options
man	60-65 years	technical secondary school	Urban residents	Married	A son	Enterprise employees	Commercial insurance	Agency institution	<6000-9999 RMB000 RMB	Excellent	You can take care of yourself	No pain at all	Full of energy	Never appear	Never appear	Never appear	Never appear	Never appear	Know	Institutional care	Couldn't agree more	Couldn't agree more	Couldn't agree more	Couldn't agree more	Requires home care	No need for community care	No institutional care is required	No need mutual pension	No alternative	Don't support	0-999	Very willing to	children	Need these	You don't need these	You don't need these	You don't need these	You don't need these	You don't need these	You don't need these	You don't need these	no other options
man	60-65 years	junior college	Urban residents	Married	A daughter	Enterprise employees	Urban residents medical treatment	Agency institution	6000-9999 RMB000-5999 RMB	General	In most cases, you can do it yourself	A little bit sore	Energy is ok	Never appear	Never appear	Never appear	Never appear	Never appear	Know	Institutional care	Partial disagree	Partial disagree	Partial disagree	Partial disagree	No need for home care	Community care is needed	Institutional care is required	Need mutual pension	No alternative	supportive	1000-1999	Willing to	oneself	You don't need these	You don't need these	You don't need these	You don't need these	need these	You don't need these	You don't need these	need these	no other options
man	66-70 years	high school	Urban residents	Married	Two sons	Institutions	None	None	6000-9999 RMB	General	In most cases, you can do it yourself	Moderate pain	Energy is ok	Never appear	Never appear	Never appear	Never appear	Never appear	Know	Mutual endowment	Partial disagree	Partial disagree	Strongly disagree	Partial disagree	Requires home care	No need for community care	No institutional care is required	No need mutual pension	No alternative	supportive	1000-1999	general	spouse	You don't need these	You don't need these	need these	You don't need these	You don't need these	You don't need these	You don't need these	You don't need these	no other options
man	60-65 years	Junior high school	Rural farmers	Married	A daughter	Migrant workers	Urban residents medical treatment	Agency institution	<6000-9999 RMB000 RMB	General	You can take care of yourself	A little bit sore	Energy is ok	rarely	rarely	rarely	rarely	rarely	Heard about it but didn't understand it	Home care					Requires home care	No need for community care	No institutional care is required	No need mutual pension	No alternative	General	0-999	general	children	Need these	need these	You don't need these	You don't need these	need these	You don't need these	You don't need these	You don't need these	no other options
man	60-65 years	junior college	Urban residents	Married	A daughter	Institutions	Town worker medical insurance	None	6000-9999 RMB	General	In most cases, you can do it yourself	A little bit sore	Low energy	Never appear	Never appear	Never appear	Never appear	Never appear	Know	Home care					Requires home care	No need for community care	Institutional care is required	No need mutual pension	No alternative	supportive	2000-2999	Willing to	oneself	Need these	You don't need these	need these	You don't need these	You don't need these	need these	You don't need these	need these	no other options
man	>80 years	junior college	Urban residents	Widowed	Two sons	Institutions	Town worker medical insurance	None	6000-9999 RMB	General	In most cases, you can do it yourself	Moderate pain	Energy is ok	Sometimes appear	Never appear	Never appear	Never appear	Sometimes appear	Know	Home care					Requires home care	Community care is needed	No institutional care is required	No need mutual pension	No alternative	supportive	2000-2999	Willing to	oneself	You don't need these	You don't need these	need these	You don't need these	You don't need these	You don't need these	You don't need these	You don't need these	no other options
man	60-65 years	junior college	Urban residents	Married	A daughter	Self-employed	Town worker medical insurance	Agency institution	6000-9999 RMB000-5999 RMB	Healthy	In most cases, you can do it yourself	A little bit sore	Energy is ok	Never appear	Never appear	Never appear	Never appear	Never appear	Know	Community care	Partial disagree	general	Partial disagree	general	Requires home care	No need for community care	Institutional care is required	No need mutual pension	No alternative	General	0-999	general	children	Need these	You don't need these	need these	need these	You don't need these	You don't need these	You don't need these	You don't need these	no other options
man	>80 years	Junior high school	Urban residents	Married	A daughter	Enterprise employees	Town worker medical insurance	Agency institution	6000-9999 RMB	General	Need someone to take care of	Moderate pain	There is no energy	Sometimes appear	rarely	rarely	rarely	Sometimes appear	Know	Community care	Couldn't agree more	Couldn't agree more	Couldn't agree more	Strongly disagree	Requires home care	No need for community care	Institutional care is required	No need mutual pension	No alternative	supportive	1000-1999	Willing to	spouse	Need these	You don't need these	You don't need these	need these	You don't need these	need these	You don't need these	You don't need these	no other options
woman	>80 years	Junior high school	Urban residents	Married	Two sons	Enterprise employees	Town worker medical insurance	Agency institution	6000-9999 RMB	General	In most cases, you can do it yourself	No pain at all	Low energy	rarely	rarely	rarely	rarely	rarely	Know	Institutional care	general	general	general	general	No need for home care	Community care is needed	Institutional care is required	No need mutual pension	No alternative	supportive	≥4000	Willing to	children	Need these	You don't need these	need these	You don't need these	need these	You don't need these	You don't need these	You don't need these	no other options
woman	>80 years	Junior high school	Urban residents	Divorced	Two daughters	Enterprise employees	Town worker medical insurance	Agency institution	6000-9999 RMB000-5999 RMB	General	In most cases, you can do it yourself	No pain at all	Energy is ok	rarely	rarely	rarely	rarely	rarely	Know	Institutional care	Strongly disagree	Strongly disagree	Strongly disagree	Partial disagree	No need for home care	No need for community care	Institutional care is required	No need mutual pension	No alternative	Excellent supportive	2000-2999	Very willing to	children	Need these	You don't need these	need these	need these	need these	You don't need these	need these	need these	no other options
woman	66-70 years	Primary school	Urban residents	Divorced	Two sons	Institutions	Town worker medical insurance	None	6000-9999 RMB000-5999 RMB	General	In most cases, you can do it yourself	A little bit sore	Energy is ok	Sometimes appear	Never appear	Never appear	Sometimes appear	Sometimes appear	Know	Institutional care	Strongly disagree	Strongly disagree	Strongly disagree	Partial disagree	Requires home care	No need for community care	Institutional care is required	No need mutual pension	No alternative	supportive	2000-2999	Willing to	children	Need these	need these	need these	need these	need these	need these	need these	need these	no other options
woman	60-65 years	junior college	Urban residents	Married	A daughter	Institutions	Town worker medical insurance	None	≥10000 RMB	Healthy	You can take care of yourself	No pain at all	Energy is ok	Never appear	Never appear	Never appear	Never appear	Never appear	Know	Institutional care	Partial disagree	Strongly disagree	Strongly disagree	Strongly disagree	Requires home care	No need for community care	No institutional care is required	No need mutual pension	No alternative	supportive	3000-3999	Very willing to	children	You don't need these	You don't need these	need these	You don't need these	need these	You don't need these	need these	You don't need these	no other options
man	>80 years	high school	Urban residents	Divorced	Two sons	Enterprise employees	Town worker medical insurance	Agency institution	6000-9999 RMB000-5999 RMB	Healthy	You can take care of yourself	Severe pain	Low energy	Never appear	Never appear	Never appear	Never appear	Never appear	Know	Institutional care	agree	agree	agree	Couldn't agree more	Requires home care	No need for community care	Institutional care is required	No need mutual pension	No alternative	supportive	2000-2999	Willing to	Other family members	You don't need these	You don't need these	You don't need these	need these	You don't need these	You don't need these	You don't need these	You don't need these	no other options
woman	60-65 years	high school	Urban residents	Married	Two sons	Migrant workers	New rural cooperative	Agency institution	<6000-9999 RMB000 RMB	Healthy	You can take care of yourself	No pain at all	Full of energy	rarely	rarely	Sometimes appear	Sometimes appear	rarely	Know very well	Home care					Requires home care	No need for community care	Institutional care is required	No need mutual pension	No alternative	Excellent supportive	1000-1999	Very willing to	oneself	Need these	You don't need these	You don't need these	You don't need these	need these	You don't need these	need these	need these	no other options
man	60-65 years	junior college	Urban residents	Married	A daughter	Institutions	Town worker medical insurance	None	≥10000 RMB	Healthy	In most cases, you can do it yourself	No pain at all	Full of energy	Never appear	Never appear	Never appear	Never appear	rarely	Know	Home care					Requires home care	Community care is needed	Institutional care is required	No need mutual pension	No alternative	supportive	1000-1999	Willing to	spouse	Need these	You don't need these	need these	need these	need these	You don't need these	need these	You don't need these	no other options
man	60-65 years	junior college	Urban residents	Married	Two daughters	Civil servants	Urban residents medical treatment	None	6000-9999 RMB	General	In most cases, you can do it yourself	Moderate pain	Energy is ok	rarely	rarely	rarely	rarely	rarely	Know	Home care					Requires home care	Community care is needed	No institutional care is required	No need mutual pension	No alternative	supportive	0-999	general	spouse	You don't need these	You don't need these	need these	You don't need these	You don't need these	You don't need these	You don't need these	You don't need these	no other options
man	60-65 years	junior college	Urban residents	Married	A daughter	Institutions	Town worker medical insurance	None	≥10000 RMB	Healthy	You can take care of yourself	No pain at all	Full of energy	Sometimes appear	rarely	Never appear	rarely	rarely	Know	Other	general	Partial disagree	Partial disagree	Partial disagree	Requires home care	No need for community care	Institutional care is required	No need mutual pension	No alternative	supportive	2000-2999	Willing to	spouse	Need these	need these	need these	need these	need these	need these	need these	need these	no other options
woman	60-65 years	high school	Urban residents	Married	A daughter	Enterprise employees	Town worker medical insurance	Agency institution	≥10000 RMB	General	You can take care of yourself	A little bit sore	Energy is ok	rarely	rarely	Never appear	Never appear	rarely	Know	Home care					Requires home care	No need for community care	No institutional care is required	No need mutual pension	No alternative	General	0-999	general	Other family members	You don't need these	need these	You don't need these	You don't need these	need these	need these	You don't need these	need these	no other options
woman	60-65 years	junior college	Urban residents	Married	A daughter	Institutions	endowment insurance、Medical insurance	None	≥10000 RMB	General	In most cases, you can do it yourself	A little bit sore	Energy is ok	rarely	rarely	rarely	Sometimes appear	Sometimes appear	Know	Community care	Partial disagree	general	Partial disagree	general	Requires home care	Community care is needed	No institutional care is required	Need mutual pension	No alternative	supportive	≥4000	Willing to	oneself	Need these	need these	need these	need these	need these	need these	need these	You don't need these	no other options
woman	60-65 years	junior college	Urban residents	Married	A daughter	Institutions	Town worker medical insurance	None	6000-9999 RMB	Healthy	You can take care of yourself	A little bit sore	Energy is ok	often appear	often appear	often appear	Sometimes appear	Sometimes appear	Know	Home care					No need for home care	Community care is needed	No institutional care is required	Need mutual pension	No alternative	supportive	1000-1999	Willing to	oneself	Need these	You don't need these	need these	need these	You don't need these	You don't need these	You don't need these	need these	no other options
man	60-65 years	junior college	Urban residents	Married	A daughter	Institutions	Town worker medical insurance	None	6000-9999 RMB	General	In most cases, you can do it yourself	No pain at all	Energy is ok	Sometimes appear	Sometimes appear	Sometimes appear	Sometimes appear	Sometimes appear	Know	Home care					Requires home care	No need for community care	No institutional care is required	Need mutual pension	No alternative	supportive	2000-2999	Willing to	oneself	Need these	You don't need these	need these	You don't need these	need these	You don't need these	You don't need these	You don't need these	no other options
man	66-70 years	junior college	Urban residents	Married	A daughter	Civil servants	Town worker medical insurance	None	≥10000 RMB	Excellent	You can take care of yourself	No pain at all	Full of energy	rarely	rarely	rarely	Sometimes appear	Never appear	Know very well	Institutional care	Strongly disagree	Strongly disagree	Strongly disagree	Strongly disagree	Requires home care	No need for community care	No institutional care is required	No need mutual pension	No alternative	Very unsupportive	2000-2999	Reluctant to	children	Need these	You don't need these	need these	You don't need these	need these	You don't need these	You don't need these	need these	no other options
woman	60-65 years	junior college	Urban residents	Married	A daughter	Enterprise employees	Town worker medical insurance	Land expropriated farmers business	≥10000 RMB	General	In most cases, you can do it yourself	No pain at all	Energy is ok	often appear	Sometimes appear	often appear	Always appear	rarely	Know	Community care	general	Partial disagree	Partial disagree	Partial disagree	Requires home care	No need for community care	Institutional care is required	No need mutual pension	No alternative	supportive	3000-3999	general	oneself	You don't need these	You don't need these	need these	You don't need these	need these	need these	need these	You don't need these	no other options
woman	60-65 years	junior college	Urban residents	Married	A daughter	Civil servants	Urban residents medical treatment	None	6000-9999 RMB	Healthy	You can take care of yourself	A little bit sore	Energy is ok	Never appear	Never appear	rarely	Never appear	Never appear	Know	Home care					Requires home care	No need for community care	No institutional care is required	No need mutual pension	No alternative	supportive	0-999	Willing to	oneself	Need these	need these	need these	You don't need these	need these	You don't need these	need these	You don't need these	no other options
man	60-65 years	high school	Urban residents	Married	Two sons	Institutions	Urban residents medical treatment	None	6000-9999 RMB	Healthy	You can take care of yourself	No pain at all	Full of energy	rarely	Never appear	rarely	Sometimes appear	Sometimes appear	Know	Community care	Partial disagree	Partial disagree	Partial disagree	Partial disagree	Requires home care	Community care is needed	Institutional care is required	Need mutual pension	No alternative	supportive	0-999	Willing to	children	Need these	You don't need these	need these	You don't need these	need these	You don't need these	You don't need these	You don't need these	no other options
man	60-65 years	junior college	Urban residents	Married	A daughter	Institutions	Urban residents medical treatment	None	≥10000 RMB	Healthy	You can take care of yourself	No pain at all	Better energy	rarely	Never appear	Never appear	Never appear	Never appear	Know	Home care					No need for home care	No need for community care	Institutional care is required	No need mutual pension	No alternative	supportive	1000-1999	Willing to	spouse	Need these	You don't need these	need these	You don't need these	need these	You don't need these	You don't need these	You don't need these	no other options
woman	60-65 years	junior college	Urban residents	Married	A daughter	Civil servants	Town worker medical insurance	None	≥10000 RMB	Healthy	You can take care of yourself	No pain at all	Full of energy	often appear	often appear	Sometimes appear	rarely	rarely	Know	Home care					No need for home care	Community care is needed	Institutional care is required	Need mutual pension	No alternative	supportive	≥4000	Very willing to	spouse	Need these	You don't need these	You don't need these	You don't need these	You don't need these	You don't need these	You don't need these	need these	no other options
woman	60-65 years	high school	Urban residents	Married	Two sons	Farmers	Town worker medical insurance	Agency institution	<6000-9999 RMB000 RMB	Healthy	You can take care of yourself	A little bit sore	Energy is ok	Sometimes appear	Sometimes appear	rarely	rarely	Never appear	Heard about it but didn't understand it	Home care					Requires home care	No need for community care	No institutional care is required	No need mutual pension	No alternative	General	0-999	general	Other family members	Need these	You don't need these	need these	You don't need these	need these	You don't need these	You don't need these	need these	no other options
woman	60-65 years	high school	Urban residents	Married	A daughter	Institutions	Urban residents medical treatment	Agency institution	≥10000 RMB	Healthy	You can take care of yourself	No pain at all	Better energy	Sometimes appear	Sometimes appear	Sometimes appear	rarely	rarely	Know very well	Community care	general	Strongly disagree	general	general	Requires home care	Community care is needed	No institutional care is required	No need mutual pension	No alternative	supportive	1000-1999	Willing to	children	Need these	You don't need these	You don't need these	You don't need these	You don't need these	You don't need these	You don't need these	need these	no other options
woman	71-75 years	high school	Urban residents	Married	Two sons	Institutions	Town worker medical insurance	None	≥10000 RMB	Bad	In most cases, you can do it yourself	Moderate pain	Low energy	Sometimes appear	Never appear	Never appear	rarely	rarely	Know	Home care					Requires home care	Community care is needed	Institutional care is required	No need mutual pension	No alternative	supportive	1000-1999	Willing to	oneself	You don't need these	need these	need these	need these	need these	You don't need these	You don't need these	You don't need these	no other options
woman	60-65 years	high school	Rural farmers	Married	A daughter	Self-employed	Town worker medical insurance	Urban workers or urban and rural residents	<6000-9999 RMB000 RMB	Healthy	You can take care of yourself	A little bit sore	Energy is ok	often appear	often appear	often appear	often appear	often appear	Heard about it but didn't understand it	Community care	general	general	general	general	Requires home care	No need for community care	Institutional care is required	Need mutual pension	No alternative	General	0-999	Willing to	children	You don't need these	You don't need these	You don't need these	need these	need these	need these	You don't need these	You don't need these	no other options
woman	60-65 years	technical secondary school	Rural farmers	Divorced	A daughter	Migrant workers	Town worker medical insurance	Agency institution	<6000-9999 RMB000 RMB	Healthy	You can take care of yourself	A little bit sore	Energy is ok	Sometimes appear	Sometimes appear	Sometimes appear	often appear	often appear	Heard about it but didn't understand it	Community care	general	general	general	general	Requires home care	Community care is needed	No institutional care is required	Need mutual pension	No alternative	General	0-999	Willing to	children	You don't need these	You don't need these	You don't need these	need these	need these	need these	You don't need these	You don't need these	no other options
woman	60-65 years	junior college	Urban residents	Married	A daughter	Enterprise employees	Urban residents medical treatment	Agency institution	6000-9999 RMB	General	You can take care of yourself	A little bit sore	Full of energy	Sometimes appear	Sometimes appear	rarely	Sometimes appear	Sometimes appear	Know very well	Institutional care	Partial disagree	Partial disagree	Partial disagree	Couldn't agree more	No need for home care	Community care is needed	Institutional care is required	Need mutual pension	No alternative	Excellent supportive	≥4000	Willing to	spouse	You don't need these	need these	You don't need these	You don't need these	You don't need these	need these	need these	You don't need these	no other options
woman	60-65 years	junior college	Urban residents	Married	A daughter	Institutions	Town worker medical insurance	None	<6000-9999 RMB000 RMB	Healthy	In most cases, you can do it yourself	A little bit sore	Energy is ok	rarely	rarely	rarely	Never appear	rarely	Know	Institutional care	general	general	general	general	Requires home care	Community care is needed	Institutional care is required	No need mutual pension	No alternative	General	0-999	Reluctant to	oneself	You don't need these	You don't need these	You don't need these	You don't need these	You don't need these	need these	You don't need these	You don't need these	no other options
woman	60-65 years	Junior high school	Urban residents	Married	A daughter	Enterprise employees	Town worker medical insurance	Agency institution	6000-9999 RMB	Healthy	You can take care of yourself	No pain at all	Energy is ok	often appear	rarely	Never appear	Never appear	Never appear	Know	Institutional care	general	Partial disagree	general	Partial disagree	Requires home care	No need for community care	Institutional care is required	No need mutual pension	No alternative	supportive	1000-1999	Willing to	oneself	You don't need these	You don't need these	need these	You don't need these	You don't need these	You don't need these	You don't need these	need these	no other options
woman	60-65 years	junior college	Urban residents	Married	A daughter	Civil servants	Town worker medical insurance	None	≥10000 RMB	Healthy	You can take care of yourself	A little bit sore	Energy is ok	Sometimes appear	often appear	Sometimes appear	often appear	often appear	Know	Institutional care	Partial disagree	Partial disagree	Partial disagree	Partial disagree	Requires home care	Community care is needed	Institutional care is required	No need mutual pension	No alternative	Excellent supportive	≥4000	Very willing to	friend	Need these	You don't need these	need these	need these	need these	You don't need these	You don't need these	need these	no other options
woman	60-65 years	Junior high school	Urban residents	Married	A daughter	Enterprise employees	Town worker medical insurance	Agency institution	≥10000 RMB	Healthy	You can take care of yourself	No pain at all	Energy is ok	Always appear	Sometimes appear	often appear	Sometimes appear	rarely	Know	Institutional care	Strongly disagree	Strongly disagree	Strongly disagree	general	Requires home care	Community care is needed	Institutional care is required	Need mutual pension	No alternative	Excellent supportive	≥4000	Willing to	oneself	Need these	need these	need these	need these	need these	need these	need these	You don't need these	no other options
woman	60-65 years	high school	Urban residents	Married	Two daughters	Self-employed	Commercial insurance	Land expropriated farmers business	<6000-9999 RMB000 RMB	Healthy	You can take care of yourself	No pain at all	Full of energy	rarely	rarely	Never appear	often appear	rarely	Know	Home care					Requires home care	Community care is needed	Institutional care is required	Need mutual pension	No alternative	supportive	0-999	Very willing to	oneself	Need these	You don't need these	need these	You don't need these	need these	You don't need these	You don't need these	You don't need these	no other options
man	76-80 years	Junior high school	Rural farmers	Married	Two sons	Migrant workers	New rural cooperative	Urban workers or urban and rural residents	6000-9999 RMB000-5999 RMB	Healthy	You can take care of yourself	A little bit sore	Energy is ok	often appear	rarely	Never appear	Never appear	rarely	Know	Home care					Requires home care	No need for community care	Institutional care is required	No need mutual pension	No alternative	General	0-999	Willing to	children	Need these	need these	need these	need these	need these	need these	need these	You don't need these	no other options
woman	60-65 years	high school	Urban residents	Married	A daughter	Enterprise employees	Urban residents medical treatment	Agency institution	≥10000 RMB	General	You can take care of yourself	A little bit sore	Energy is ok	Sometimes appear	Sometimes appear	rarely	rarely	rarely	Know	Home care					Requires home care	No need for community care	Institutional care is required	Need mutual pension	No alternative	supportive	2000-2999	Willing to	oneself	Need these	You don't need these	need these	You don't need these	need these	You don't need these	You don't need these	You don't need these	no other options
man	60-65 years	high school	Urban residents	Married	Two sons	Self-employed	New rural cooperative	Urban workers or urban and rural residents	6000-9999 RMB	General	In most cases, you can do it yourself	No pain at all	Energy is ok	Sometimes appear	Sometimes appear	Sometimes appear	rarely	rarely	Know	Other	general	Partial disagree	general	general	Requires home care	Community care is needed	Institutional care is required	Need mutual pension	No alternative	General	0-999	general	children	You don't need these	You don't need these	need these	need these	need these	You don't need these	You don't need these	need these	no other options
woman	60-65 years	high school	Rural farmers	Married	A daughter	Migrant workers	New rural cooperative	Urban workers or urban and rural residents	6000-9999 RMB000-5999 RMB	Bad	You can take care of yourself	A little bit sore	Energy is ok	often appear	rarely	rarely	rarely	rarely	Know very well	Home care					Requires home care	Community care is needed	No institutional care is required	Need mutual pension	No alternative	supportive	1000-1999	Willing to	spouse	Need these	You don't need these	need these	You don't need these	You don't need these	You don't need these	need these	You don't need these	no other options
man	66-70 years	high school	Rural farmers	Married	Two sons	Enterprise employees	Town worker medical insurance	Agency institution	6000-9999 RMB000-5999 RMB	Healthy	In most cases, you can do it yourself	A little bit sore	Energy is ok	often appear	Sometimes appear	rarely	rarely	rarely	Know	Home care					Requires home care	No need for community care	Institutional care is required	No need mutual pension	Other options	supportive	1000-1999	Willing to	oneself	Need these	You don't need these	need these	You don't need these	need these	You don't need these	You don't need these	You don't need these	no other options
woman	60-65 years	high school	Urban residents	Married	A daughter	Institutions	Town worker medical insurance	None	6000-9999 RMB	Healthy	You can take care of yourself	No pain at all	Energy is ok	Sometimes appear	Sometimes appear	rarely	rarely	rarely	Know	Community care	Strongly disagree	Strongly disagree	Strongly disagree	Partial disagree	Requires home care	Community care is needed	No institutional care is required	Need mutual pension	No alternative	supportive	0-999	Willing to	children	Need these	You don't need these	need these	You don't need these	need these	You don't need these	You don't need these	You don't need these	no other options
man	60-65 years	high school	Urban residents	Married	A daughter	Enterprise employees	None	Agency institution	6000-9999 RMB000-5999 RMB	General	You can take care of yourself	A little bit sore	Energy is ok	Sometimes appear	rarely	rarely	rarely	rarely	Heard about it but didn't understand it	Home care					Requires home care	No need for community care	No institutional care is required	Need mutual pension	No alternative	General	0-999	general	oneself	You don't need these	need these	You don't need these	You don't need these	You don't need these	You don't need these	You don't need these	You don't need these	no other options
man	60-65 years	junior college	Urban residents	Married	A daughter	Enterprise employees	Town worker medical insurance	Agency institution	6000-9999 RMB	Healthy	You can take care of yourself	Moderate pain	Energy is ok	Sometimes appear	Sometimes appear	rarely	Sometimes appear	rarely	Know	Home care					Requires home care	No need for community care	Institutional care is required	Need mutual pension	No alternative	Excellent supportive	≥4000	Very willing to	oneself	Need these	need these	need these	need these	need these	need these	need these	need these	no other options
man	60-65 years	junior college	Rural farmers	Married	A daughter	Migrant workers	Town worker medical insurance	Agency institution	≥10000 RMB	Healthy	You can take care of yourself	A little bit sore	Better energy	Sometimes appear	Sometimes appear	Sometimes appear	Sometimes appear	rarely	Heard about it but didn't understand it	Institutional care	Partial disagree	Partial disagree	Strongly disagree	agree	Requires home care	Community care is needed	Institutional care is required	No need mutual pension	No alternative	supportive	0-999	Very willing to	children	Need these	need these	You don't need these	You don't need these	need these	You don't need these	You don't need these	need these	no other options
man	60-65 years	high school	Rural farmers	Married	Two daughters	Enterprise employees	endowment insurance、Medical insurance	Agency institution	6000-9999 RMB000-5999 RMB	Healthy	You can take care of yourself	No pain at all	Better energy	Sometimes appear	Sometimes appear	rarely	rarely	rarely	Know	Community care	general	Couldn't agree more	agree	agree	Requires home care	No need for community care	Institutional care is required	No need mutual pension	No alternative	supportive	0-999	Willing to	children	You don't need these	need these	need these	You don't need these	You don't need these	You don't need these	You don't need these	You don't need these	no other options
woman	60-65 years	high school	Rural farmers	Married	Two sons	Enterprise employees	New rural cooperative	Urban workers or urban and rural residents	<6000-9999 RMB000 RMB	General	You can take care of yourself	No pain at all	Better energy	Never appear	Never appear	Never appear	Never appear	Never appear	Know very well	Home care					Requires home care	Community care is needed	No institutional care is required	No need mutual pension	No alternative	General	0-999	Willing to	children	You don't need these	You don't need these	need these	You don't need these	You don't need these	You don't need these	You don't need these	You don't need these	no other options
woman	>80 years	Primary school	Rural farmers	Married	Two daughters	Migrant workers	New rural cooperative	Urban workers or urban and rural residents	<6000-9999 RMB000 RMB	Bad	In most cases, you can do it yourself	Moderate pain	Low energy	Sometimes appear	rarely	often appear	often appear	Sometimes appear	Know	Community care	Partial disagree	Partial disagree	Partial disagree	Partial disagree	Requires home care	Community care is needed	Institutional care is required	Need mutual pension	No alternative	supportive	1000-1999	general	spouse	You don't need these	You don't need these	need these	need these	need these	You don't need these	You don't need these	You don't need these	no other options
man	60-65 years	high school	Rural farmers	Married	Two sons	Enterprise employees	Town worker medical insurance	Agency institution	6000-9999 RMB000-5999 RMB	Healthy	You can take care of yourself	A little bit sore	Better energy	Never appear	Never appear	rarely	Sometimes appear	Sometimes appear	Know	Home care					Requires home care	No need for community care	No institutional care is required	No need mutual pension	No alternative	supportive	1000-1999	Willing to	children	Need these	You don't need these	need these	need these	need these	need these	You don't need these	You don't need these	no other options
man	60-65 years	high school	Rural farmers	Married	A daughter	Migrant workers	New rural cooperative	Agency institution	6000-9999 RMB000-5999 RMB	Excellent	You can take care of yourself	No pain at all	Better energy	Never appear	Never appear	rarely	rarely	Sometimes appear	Know	Institutional care	Strongly disagree	Strongly disagree	Strongly disagree	Strongly disagree	Requires home care	No need for community care	Institutional care is required	Need mutual pension	No alternative	Excellent supportive	1000-1999	Very willing to	oneself	Need these	need these	need these	need these	need these	need these	need these	You don't need these	no other options
woman	60-65 years	high school	Urban residents	Married	Two daughters	Migrant workers	New rural cooperative	Urban workers or urban and rural residents	<6000-9999 RMB000 RMB	General	You can take care of yourself	A little bit sore	Energy is ok	rarely	rarely	rarely	Sometimes appear	rarely	Know	Home care					Requires home care	Community care is needed	Institutional care is required	No need mutual pension	No alternative	supportive	1000-1999	Willing to	oneself	Need these	You don't need these	You don't need these	You don't need these	You don't need these	need these	You don't need these	You don't need these	no other options
man	60-65 years	junior college	Urban residents	Married	A daughter	Enterprise employees	Town worker medical insurance	Agency institution	≥10000 RMB	Healthy	You can take care of yourself	A little bit sore	Better energy	Sometimes appear	Sometimes appear	rarely	rarely	rarely	Know	Institutional care	general	Partial disagree	Partial disagree	Partial disagree	Requires home care	No need for community care	Institutional care is required	No need mutual pension	No alternative	supportive	1000-1999	Willing to	spouse	Need these	You don't need these	You don't need these	need these	need these	need these	You don't need these	need these	no other options
man	71-75 years	high school	Rural farmers	Married	Two sons	Farmers	None	Urban workers or urban and rural residents	6000-9999 RMB000-5999 RMB	Healthy	You can take care of yourself	A little bit sore	Full of energy	often appear	rarely	rarely	rarely	rarely	Know	Institutional care	Strongly disagree	Partial disagree	Strongly disagree	Strongly disagree	Requires home care	Community care is needed	No institutional care is required	Need mutual pension	No alternative	supportive	0-999	Willing to	children	Need these	need these	need these	You don't need these	You don't need these	You don't need these	You don't need these	You don't need these	no other options
man	60-65 years	junior college	Urban residents	Married	Two sons	Self-employed	Town worker medical insurance	Agency institution	6000-9999 RMB000-5999 RMB	General	You can take care of yourself	A little bit sore	Better energy	often appear	Sometimes appear	rarely	rarely	rarely	Know	Institutional care	general	general	Partial disagree	general	Requires home care	Community care is needed	No institutional care is required	Need mutual pension	No alternative	supportive	1000-1999	Willing to	Other family members	Need these	You don't need these	You don't need these	You don't need these	You don't need these	You don't need these	You don't need these	You don't need these	no other options
woman	60-65 years	high school	Rural farmers	Married	Two sons	Migrant workers	New rural cooperative	Urban workers or urban and rural residents	6000-9999 RMB000-5999 RMB	General	You can take care of yourself	No pain at all	Full of energy	rarely	Never appear	rarely	rarely	rarely	Heard about it but didn't understand it	Home care					Requires home care	Community care is needed	Institutional care is required	Need mutual pension	No alternative	General	0-999	Willing to	oneself	Need these	You don't need these	need these	You don't need these	need these	You don't need these	You don't need these	need these	no other options
man	60-65 years	high school	Rural farmers	Married	Two sons	Enterprise employees	Town worker medical insurance	Agency institution	6000-9999 RMB000-5999 RMB	Healthy	You can take care of yourself	A little bit sore	Better energy	Always appear	Sometimes appear	Always appear	Sometimes appear	Always appear	Know very well	Institutional care	general	Partial disagree	Strongly disagree	Strongly disagree	Requires home care	Community care is needed	Institutional care is required	Need mutual pension	No alternative	supportive	1000-1999	Willing to	oneself	Need these	You don't need these	You don't need these	need these	need these	You don't need these	You don't need these	need these	no other options
woman	60-65 years	high school	Urban residents	Married	A daughter	Institutions	Town worker medical insurance	None	6000-9999 RMB	Healthy	You can take care of yourself	No pain at all	Full of energy	Always appear	often appear	Always appear	Sometimes appear	Always appear	Know	Home care					Requires home care	Community care is needed	Institutional care is required	Need mutual pension	No alternative	supportive	2000-2999	Willing to	oneself	Need these	You don't need these	You don't need these	You don't need these	You don't need these	You don't need these	You don't need these	You don't need these	no other options
man	60-65 years	high school	Rural farmers	Married	Two sons	Farmers	New rural cooperative	Urban workers or urban and rural residents	6000-9999 RMB000-5999 RMB	Healthy	In most cases, you can do it yourself	A little bit sore	Low energy	often appear	Sometimes appear	rarely	rarely	rarely	Know	Home care					Requires home care	Community care is needed	No institutional care is required	Need mutual pension	No alternative	General	0-999	general	friend	You don't need these	You don't need these	You don't need these	You don't need these	You don't need these	need these	You don't need these	You don't need these	no other options
man	60-65 years	high school	Urban residents	Married	A daughter	Self-employed	Town worker medical insurance	Agency institution	≥10000 RMB	Excellent	You can take care of yourself	No pain at all	Full of energy	Never appear	Never appear	Never appear	Never appear	Never appear	Know very well	Home care					Requires home care	Community care is needed	Institutional care is required	No need mutual pension	No alternative	Excellent supportive	2000-2999	Very willing to	spouse	Need these	need these	need these	need these	need these	You don't need these	need these	You don't need these	no other options
woman	60-65 years	junior college	Urban residents	Widowed	A daughter	Enterprise employees	None	Agency institution	6000-9999 RMB000-5999 RMB	Healthy	You can take care of yourself	No pain at all	Better energy	Sometimes appear	Never appear	rarely	rarely	Never appear	Know very well	Other	agree	agree	Partial disagree	agree	Requires home care	Community care is needed	No institutional care is required	Need mutual pension	Other options	Excellent supportive	3000-3999	Very willing to	children	You don't need these	You don't need these	You don't need these	You don't need these	need these	You don't need these	You don't need these	You don't need these	no other options
man	60-65 years	high school	Rural farmers	Married	A daughter	Migrant workers	Town worker medical insurance	Urban workers or urban and rural residents	6000-9999 RMB	Excellent	You can take care of yourself	No pain at all	Better energy	rarely	Never appear	Never appear	Sometimes appear	rarely	Know	Home care					Requires home care	Community care is needed	No institutional care is required	Need mutual pension	No alternative	supportive	0-999	Very willing to	children	Need these	You don't need these	You don't need these	You don't need these	You don't need these	You don't need these	You don't need these	need these	no other options
woman	60-65 years	high school	Rural farmers	Married	A daughter	Self-employed	New rural cooperative	Urban workers or urban and rural residents	<6000-9999 RMB000 RMB	Healthy	You can take care of yourself	No pain at all	Full of energy	rarely	Never appear	Never appear	Never appear	Never appear	Know	Home care					Requires home care	Community care is needed	No institutional care is required	Need mutual pension	No alternative	supportive	1000-1999	Willing to	oneself	You don't need these	You don't need these	You don't need these	need these	You don't need these	You don't need these	You don't need these	You don't need these	no other options
woman	60-65 years	junior college	Urban residents	Married	A daughter	Institutions	Town worker medical insurance	None	≥10000 RMB	Excellent	You can take care of yourself	A little bit sore	Energy is ok	rarely	rarely	rarely	Never appear	Sometimes appear	Know	Community care	general	Couldn't agree more	Couldn't agree more	Couldn't agree more	Requires home care	Community care is needed	Institutional care is required	No need mutual pension	No alternative	General	3000-3999	general	children	Need these	need these	need these	need these	need these	need these	need these	You don't need these	no other options
woman	60-65 years	junior college	Urban residents	Married	A daughter	Enterprise employees	Town worker medical insurance	Agency institution	<6000-9999 RMB000 RMB	General	In most cases, you can do it yourself	A little bit sore	Better energy	often appear	Sometimes appear	often appear	Sometimes appear	rarely	Know	Home care					Requires home care	Community care is needed	Institutional care is required	No need mutual pension	No alternative	supportive	1000-1999	Willing to	children	You don't need these	You don't need these	You don't need these	need these	You don't need these	You don't need these	You don't need these	need these	no other options
man	60-65 years	junior college	Urban residents	Married	A daughter	Institutions	Town worker medical insurance	None	6000-9999 RMB	Excellent	You can take care of yourself	No pain at all	Full of energy	often appear	often appear	often appear	Always appear	Always appear	Know	Home care					Requires home care	Community care is needed	Institutional care is required	Need mutual pension	No alternative	Excellent supportive	1000-1999	Very willing to	spouse	Need these	You don't need these	You don't need these	need these	need these	need these	need these	need these	no other options
woman	60-65 years	junior college	Urban residents	Married	A daughter	Institutions	New rural cooperative	None	≥10000 RMB	Healthy	You can take care of yourself	No pain at all	Full of energy	often appear	Always appear	Sometimes appear	often appear	often appear	Know	Institutional care	Couldn't agree more	agree	general	general	Requires home care	No need for community care	No institutional care is required	Need mutual pension	No alternative	supportive	1000-1999	Very willing to	spouse	Need these	You don't need these	need these	You don't need these	need these	need these	You don't need these	You don't need these	no other options
man	60-65 years	high school	Urban residents	Married	A daughter	Institutions	Town worker medical insurance	None	6000-9999 RMB	Healthy	You can take care of yourself	No pain at all	Full of energy	Always appear	often appear	Always appear	Always appear	often appear	Know	Community care	agree	general	general	Couldn't agree more	No need for home care	Community care is needed	No institutional care is required	No need mutual pension	No alternative	General	0-999	Willing to	oneself	Need these	need these	need these	need these	You don't need these	You don't need these	need these	You don't need these	no other options
man	66-70 years	junior college	Urban residents	Married	A daughter	Civil servants	Town worker medical insurance	None	6000-9999 RMB	General	In most cases, you can do it yourself	A little bit sore	Energy is ok	Never appear	rarely	Never appear	Never appear	rarely	Know	Community care	general	general	general	Couldn't agree more	Requires home care	No need for community care	No institutional care is required	Need mutual pension	No alternative	General	1000-1999	Very willing to	oneself	Need these	You don't need these	You don't need these	You don't need these	need these	You don't need these	You don't need these	You don't need these	no other options
man	60-65 years	junior college	Urban residents	Married	A daughter	Institutions	Town worker medical insurance	None	6000-9999 RMB	General	In most cases, you can do it yourself	Moderate pain	Energy is ok	often appear	often appear	often appear	Sometimes appear	rarely	Know	Home care					Requires home care	Community care is needed	No institutional care is required	No need mutual pension	No alternative	General	2000-2999	general	oneself	You don't need these	You don't need these	You don't need these	need these	You don't need these	You don't need these	You don't need these	You don't need these	no other options
man	60-65 years	junior college	Urban residents	Married	A daughter	Enterprise employees	endowment insurance、Medical insurance	None	≥10000 RMB	Excellent	You can take care of yourself	No pain at all	Full of energy	Never appear	Never appear	Never appear	Never appear	Never appear	Know	Community care	Couldn't agree more	Couldn't agree more	Couldn't agree more	agree	Requires home care	Community care is needed	Institutional care is required	No need mutual pension	No alternative	Excellent supportive	3000-3999	Very willing to	children	Need these	You don't need these	You don't need these	You don't need these	You don't need these	You don't need these	You don't need these	You don't need these	no other options
man	60-65 years	junior college	Urban residents	Married	A daughter	Enterprise employees	Town worker medical insurance	Agency institution	6000-9999 RMB000-5999 RMB	General	In most cases, you can do it yourself	Moderate pain	Energy is ok	rarely	rarely	rarely	rarely	rarely	Know	Community care	general	general	general	general	Requires home care	Community care is needed	Institutional care is required	No need mutual pension	No alternative	General	0-999	general	oneself	You don't need these	need these	You don't need these	You don't need these	You don't need these	You don't need these	You don't need these	You don't need these	no other options
man	60-65 years	junior college	Urban residents	Married	A daughter	Enterprise employees	Commercial insurance	Agency institution	6000-9999 RMB	Healthy	You can take care of yourself	No pain at all	Full of energy	Sometimes appear	Sometimes appear	Sometimes appear	Sometimes appear	Sometimes appear	Know very well	Institutional care	Couldn't agree more	Couldn't agree more	Couldn't agree more	Couldn't agree more	Requires home care	No need for community care	No institutional care is required	Need mutual pension	No alternative	General	2000-2999	Willing to	children	You don't need these	You don't need these	You don't need these	You don't need these	You don't need these	need these	You don't need these	You don't need these	no other options
man	60-65 years	high school	Urban residents	Married	A daughter	Enterprise employees	Town worker medical insurance	Agency institution	6000-9999 RMB000-5999 RMB	Healthy	You can take care of yourself	A little bit sore	Energy is ok	Sometimes appear	Sometimes appear	rarely	rarely	rarely	Know	Institutional care	agree	agree	Partial disagree	agree	Requires home care	Community care is needed	Institutional care is required	Need mutual pension	No alternative	supportive	0-999	Willing to	oneself	You don't need these	need these	You don't need these	You don't need these	need these	You don't need these	need these	You don't need these	no other options
woman	60-65 years	high school	Urban residents	Married	A daughter	Enterprise employees	Town worker medical insurance	Agency institution	6000-9999 RMB000-5999 RMB	Healthy	You can take care of yourself	No pain at all	Energy is ok	Never appear	Never appear	Never appear	Never appear	Never appear	Know	Institutional care	general	general	general	general	Requires home care	Community care is needed	Institutional care is required	Need mutual pension	No alternative	General	0-999	Willing to	oneself	Need these	You don't need these	need these	You don't need these	need these	You don't need these	You don't need these	You don't need these	no other options
woman	60-65 years	Primary school the following	Urban residents	Married	A daughter	Enterprise employees	None	Agency institution	<6000-9999 RMB000 RMB	General	In most cases, you can do it yourself	A little bit sore	Energy is ok	rarely	Never appear	Sometimes appear	rarely	rarely	Heard about it but didn't understand it	Institutional care	Couldn't agree more	general	Couldn't agree more	Couldn't agree more	Requires home care	No need for community care	Institutional care is required	No need mutual pension	No alternative	General	0-999	general	children	You don't need these	You don't need these	You don't need these	You don't need these	need these	You don't need these	You don't need these	You don't need these	no other options
woman	60-65 years	junior college	Urban residents	Married	A daughter	Migrant workers	Commercial insurance	Agency institution	6000-9999 RMB000-5999 RMB	Excellent	You can take care of yourself	No pain at all	Full of energy	often appear	Sometimes appear	often appear	often appear	Always appear	Know	Institutional care	general	general	general	general	Requires home care	No need for community care	No institutional care is required	No need mutual pension	No alternative	Excellent supportive	0-999	Very willing to	children	You don't need these	You don't need these	need these	You don't need these	You don't need these	You don't need these	You don't need these	need these	no other options
man	60-65 years	junior college	Urban residents	Married	A daughter	Enterprise employees	Town worker medical insurance	Agency institution	6000-9999 RMB000-5999 RMB	General	You can take care of yourself	A little bit sore	Energy is ok	Always appear	often appear	often appear	Always appear	often appear	Know	Home care					Requires home care	Community care is needed	No institutional care is required	No need mutual pension	No alternative	General	2000-2999	Willing to	children	You don't need these	You don't need these	You don't need these	You don't need these	You don't need these	need these	You don't need these	You don't need these	no other options
man	60-65 years	junior college	Urban residents	Married	A daughter	Civil servants	Town worker medical insurance	Urban workers or urban and rural residents	6000-9999 RMB	Excellent	You can take care of yourself	Moderate pain	Full of energy	Never appear	Never appear	Never appear	rarely	Never appear	Know	Home care					Requires home care	No need for community care	Institutional care is required	No need mutual pension	Other options	Excellent supportive	0-999	Very willing to	children	Need these	You don't need these	You don't need these	You don't need these	You don't need these	You don't need these	You don't need these		no other options
woman	60-65 years	junior college	Urban residents	Married	Two sons	Enterprise employees	Town worker medical insurance	Agency institution	≥10000 RMB	Healthy	You can take care of yourself	No pain at all	Better energy	rarely	Never appear	Never appear	Never appear	Sometimes appear	Know	Home care					Requires home care	Community care is needed	No institutional care is required	No need mutual pension	No alternative	supportive	≥4000	general	oneself	You don't need these	You don't need these	need these	You don't need these	You don't need these	You don't need these	You don't need these	You don't need these	no other options
man	60-65 years	junior college	Urban residents	Married	A daughter	Institutions	endowment insurance、Medical insurance	None	6000-9999 RMB000-5999 RMB	Healthy	You can take care of yourself	A little bit sore	Energy is ok	Sometimes appear	rarely	often appear	often appear	rarely	Know	Other	general	general	general	general	Requires home care	Community care is needed	Institutional care is required	No need mutual pension	No alternative	supportive	0-999	Very willing to	oneself	You don't need these	You don't need these	need these	You don't need these	You don't need these	You don't need these	You don't need these	need these	no other options
woman	60-65 years	junior college	Urban residents	Married	A daughter	Enterprise employees	Town worker medical insurance	Agency institution	6000-9999 RMB000-5999 RMB	Healthy	You can take care of yourself	No pain at all	Full of energy	rarely	Never appear	rarely	rarely	Never appear	Know very well	Home care					Requires home care	Community care is needed	No institutional care is required	No need mutual pension	No alternative	Excellent supportive	0-999	Very willing to	oneself	Need these	need these	need these	need these	need these	need these	need these	You don't need these	no other options
man	60-65 years	junior college	Urban residents	Single	A daughter	Farmers	endowment insurance、Medical insurance	Agency institution	6000-9999 RMB000-5999 RMB	Healthy	You can take care of yourself	A little bit sore	Better energy	Never appear	Never appear	Never appear	rarely	Never appear	Know	Home care					Requires home care	Community care is needed	Institutional care is required	Need mutual pension	No alternative	supportive	0-999	Willing to	spouse	You don't need these	You don't need these	You don't need these	You don't need these	You don't need these	You don't need these	need these	You don't need these	no other options
man	60-65 years	junior college	Urban residents	Married	A daughter	Enterprise employees	Town worker medical insurance	Agency institution	≥10000 RMB	Excellent	You can take care of yourself	No pain at all	Full of energy	often appear	rarely	often appear	often appear	Never appear	Know	Community care					Requires home care	Community care is needed	Institutional care is required	Need mutual pension	No alternative	Excellent supportive	1000-1999	Willing to	spouse	Need these	You don't need these	You don't need these	You don't need these	need these	need these	You don't need these	need these	no other options
man	60-65 years	high school	Urban residents	Married	A daughter	Enterprise employees	endowment insurance、Medical insurance	Agency institution	6000-9999 RMB	Healthy	You can take care of yourself	No pain at all	Energy is ok	rarely	rarely	rarely	Never appear	Never appear	Know	Institutional care	agree	agree	Couldn't agree more	agree	Requires home care	Community care is needed	Institutional care is required	Need mutual pension	No alternative	General	1000-1999	Willing to	oneself	Need these	You don't need these	You don't need these	You don't need these	You don't need these	You don't need these	You don't need these	You don't need these	no other options
woman	60-65 years	junior college	Urban residents	Married	Two sons	Institutions	Town worker medical insurance	None	≥10000 RMB	Healthy	You can take care of yourself	No pain at all	Full of energy	Never appear	Never appear	Never appear	rarely	rarely	Know	Institutional care	agree	agree	agree	agree	Requires home care	No need for community care	No institutional care is required	No need mutual pension	No alternative	supportive	2000-2999	Willing to	oneself	You don't need these	You don't need these	need these	You don't need these	need these	You don't need these	need these	You don't need these	no other options
woman	60-65 years	high school	Urban residents	Married	A daughter	Enterprise employees	Urban residents medical treatment	Agency institution	6000-9999 RMB	Healthy	You can take care of yourself	A little bit sore	Full of energy	Sometimes appear	Never appear	rarely	Never appear	Never appear	Know	Institutional care	Couldn't agree more	Couldn't agree more	Couldn't agree more	Strongly disagree	Requires home care	Community care is needed	Institutional care is required	No need mutual pension	No alternative	supportive	0-999	Very willing to	oneself	Need these	need these	You don't need these	You don't need these	You don't need these	need these	You don't need these	You don't need these	no other options
man	60-65 years	junior college	Urban residents	Married	A daughter	Institutions	endowment insurance、Medical insurance	None	6000-9999 RMB	Excellent	You can take care of yourself	No pain at all	Full of energy	Never appear	Never appear	Never appear	Never appear	rarely	Heard about it but didn't understand it	Home care					Requires home care	No need for community care	No institutional care is required	No need mutual pension	No alternative	Excellent supportive	0-999	Willing to	children	Need these	You don't need these	You don't need these	You don't need these	You don't need these	You don't need these	You don't need these	You don't need these	no other options
man	60-65 years	high school	Rural farmers	Married	Two sons	Migrant workers	New rural cooperative	Urban workers or urban and rural residents	6000-9999 RMB000-5999 RMB	General	You can take care of yourself	No pain at all	Full of energy	Sometimes appear	Sometimes appear	rarely	Sometimes appear	Sometimes appear	Know	Home care					Requires home care	No need for community care	Institutional care is required	No need mutual pension	No alternative	supportive	1000-1999	Willing to	children	You don't need these	You don't need these	need these	You don't need these	You don't need these	You don't need these	You don't need these	need these	no other options
woman	71-75 years	junior college	Urban residents	Married	A daughter	Institutions	Town worker medical insurance	None	≥10000 RMB	Healthy	You can take care of yourself	No pain at all	Energy is ok	Never appear	Never appear	Never appear	Never appear	Never appear	Know	Home care					Requires home care	No need for community care	No institutional care is required	No need mutual pension	No alternative	supportive	3000-3999	Very willing to	children	Need these	You don't need these	need these	You don't need these	need these	You don't need these	You don't need these	need these	no other options
woman	66-70 years	high school	Urban residents	Married	A daughter	Institutions	Urban residents medical treatment	None	≥10000 RMB	Healthy	You can take care of yourself	A little bit sore	Energy is ok	rarely	Sometimes appear	rarely	Sometimes appear	Sometimes appear	Know very well	Community care	general	general	general	Couldn't agree more	Requires home care	No need for community care	Institutional care is required	No need mutual pension	No alternative	supportive	0-999	Very willing to	children	You don't need these	You don't need these	You don't need these	need these	need these	need these	need these	You don't need these	no other options
man	71-75 years	junior college	Urban residents	Married	A daughter	Institutions	Urban residents medical treatment	None	≥10000 RMB	Healthy	You can take care of yourself	No pain at all	Better energy	Never appear	Never appear	Never appear	Never appear	Never appear	Know very well	Community care	general	agree	general	general	No need for home care	Community care is needed	No institutional care is required	No need mutual pension	No alternative	Excellent supportive	0-999	Willing to	children	Need these	You don't need these	need these	need these	You don't need these	You don't need these	You don't need these	You don't need these	no other options
woman	60-65 years	junior college	Urban residents	Married	A daughter	Enterprise employees	Urban residents medical treatment	Agency institution	6000-9999 RMB	General	You can take care of yourself	No pain at all	Full of energy	Sometimes appear	rarely	Never appear	rarely	rarely	Know very well	Institutional care	agree	general	agree	Couldn't agree more	Requires home care	No need for community care	Institutional care is required	No need mutual pension	No alternative	Excellent supportive	2000-2999	Willing to	oneself	Need these	You don't need these	You don't need these	need these	You don't need these	need these	need these	need these	no other options
